# Supplementary material for: Progression of disease preceding lower extremity amputation in Denmark: a longitudinal registry study of diagnoses, use of medication and healthcare services 14 years prior to amputation
Source: PubMed Central journal article supplement — BMJ Open. 2017 Nov 3;7(11):e016030. doi: 10.1136/bmjopen-2017-016030 (PMC5695421; doi:10.1136/bmjopen-2017-016030), 2017-11-03
Supplement: bmjopen-2017-016030.draft_revisions.pdf [file bmjopen-2017-016030.draft_revisions.pdf]

# BMJ Open

BMJ Open is committed to open peer review. As part of this commitment we make the peer review history of every article we publish publicly available.

When an article is published we post the peer reviewers' comments and the authors' responses online. We also post the versions of the paper that were used during peer review. These are the versions that the peer review comments apply to.

The versions of the paper that follow are the versions that were submitted during the peer review process. They are not the versions of record or the final published versions. They should not be cited or distributed as the published version of this manuscript.

BMJ Open is an open access journal and the full, final, typeset and author-corrected version of record of the manuscript is available on our site with no access controls, subscription charges or pay-per-view fees (<http://bmjopen.bmj.com>).

If you have any questions on BMJ Open's open peer review process please email [info.bmjopen@bmj.com](mailto:info.bmjopen@bmj.com)

# BMJ Open

## Progression of disease preceding lower extremity amputation: A longitudinal registry study of diagnoses, use of medication and healthcare services 14 years prior to amputation

|                                 |                                                                                                                                                                                                                                                                                                                                                                                                                                                                                                                                                                                                              |
|---------------------------------|--------------------------------------------------------------------------------------------------------------------------------------------------------------------------------------------------------------------------------------------------------------------------------------------------------------------------------------------------------------------------------------------------------------------------------------------------------------------------------------------------------------------------------------------------------------------------------------------------------------|
| Journal:                        | <i>BMJ Open</i>                                                                                                                                                                                                                                                                                                                                                                                                                                                                                                                                                                                              |
| Manuscript ID                   | bmjopen-2017-016030                                                                                                                                                                                                                                                                                                                                                                                                                                                                                                                                                                                          |
| Article Type:                   | Research                                                                                                                                                                                                                                                                                                                                                                                                                                                                                                                                                                                                     |
| Date Submitted by the Author:   | 25-Jan-2017                                                                                                                                                                                                                                                                                                                                                                                                                                                                                                                                                                                                  |
| Complete List of Authors:       | Jensen, Pia; Copenhagen University Hospital, Hvidovre, Optimed, Clinical Research centre<br>Petersen, Janne; Copenhagen University Hospital, Hvidovre, Clinical Research Centre (056); Department of Public Health Section of Biostatistics, University of Copenhagen, Denmark<br>Kirketerp-Møller, Klaus; University Hospital of Copenhagen, Bispebjerg, Copenhagen Wound Healing Centre<br>Poulsen, Ingrid; Traumatic Brain Injury Unit, Rigshospitalet, Copenhagen, Denmark , Clinic of Neurorehabilitation<br>Andersen, Ove; Copenhagen University Hospital, Hvidovre, Denmark, Clinical Research Centre |
| <b>Primary Subject Heading</b>: | Health services research                                                                                                                                                                                                                                                                                                                                                                                                                                                                                                                                                                                     |
| Secondary Subject Heading:      | Diabetes and endocrinology, Epidemiology, Cardiovascular medicine                                                                                                                                                                                                                                                                                                                                                                                                                                                                                                                                            |
| Keywords:                       | Lower extremity amputation, Atherosclerosis, Diabetes, Healthcare service                                                                                                                                                                                                                                                                                                                                                                                                                                                                                                                                    |
|                                 |                                                                                                                                                                                                                                                                                                                                                                                                                                                                                                                                                                                                              |

SCHOLARONE™  
Manuscripts

1  
2  
3 1 **Title**

4  
5  
6 2 Progression of disease preceding lower extremity amputation: A longitudinal registry study of  
7  
8 3 diagnoses, use of medication and healthcare services 14 years prior to amputation

9  
10  
11 4 **Corresponding author**

12  
13 5 Pia S e Jensen (1,2)

14  
15 6 Research team: Optimed (Optimized Senior Patient Program)

16  
17 7 Postal address: Clinical Research Centre, Copenhagen University Hospital, Hvidovre,

18  
19 8 Ketteg rd Alle 30, 2650 Hvidovre, Denmark.

20  
21 9 Telephone +45 38 62 24 64,

22  
23 10 E-mail: [Ann.Pia.Soee.Lytken.Jensen@regionh.dk](mailto:Ann.Pia.Soee.Lytken.Jensen@regionh.dk)

24  
25  
26  
27  
28  
29  
30  
31  
32  
33  
34  
35  
36  
37  
38  
39  
40  
41  
42  
43  
44  
45  
46  
47  
48  
49  
50  
51  
52  
53  
54  
55  
56  
57  
58  
59  
60

12 **CoAuthors:**

13 Janne Petersen (1,3), e-mail [Janne.Petersen.01@regionh.dk](mailto:Janne.Petersen.01@regionh.dk)

14 Klaus Kirketerp-M ller (4), e-mail [klaus.kirketerp-moeller.01@regionh.dk](mailto:klaus.kirketerp-moeller.01@regionh.dk)

15 Ingrid Poulsen (5), e-mail [Ingrid.Poulsen@regionh.dk](mailto:Ingrid.Poulsen@regionh.dk)

16 Ove Andersen (1), e-mail [Ove.Andersen@regionh.dk](mailto:Ove.Andersen@regionh.dk)

17  
18 **Affiliations:**

19 (1) Clinical Research Centre Copenhagen University Hospital, Hvidovre, Denmark

20 (2) Department of Orthopaedic Surgery, Copenhagen University Hospital, Hvidovre,  
21 Denmark

22 (3) Department of Public Health Section of Biostatistics, University of Copenhagen,  
23 Denmark

24 (4) Copenhagen Wound Healing Centre, University Hospital of Copenhagen, Bispebjerg,  
25 Denmark

26 (5) Clinic of Neurorehabilitation, Traumatic Brain Injury Unit, Rigshospitalet,  
27 Copenhagen, Denmark

28 **Word count:** 3951

1  
2  
3 29 **Abstract**  
4  
5

6 30 **Objectives:** Patients with non-traumatic lower extremity amputation are characterised by  
7  
8 31 high age, multi-morbidity and polypharmacy and long term complications of atherosclerosis  
9  
10 32 and diabetes. To ensure early identification of patients at risk of amputation, we need to gain  
11  
12 33 knowledge about the progression of diseases related to lower extremity amputations during  
13  
14 34 the years preceding the amputation.

15  
16 35 **Design:** A population-based national registry study.  
17  
18

19 36 **Setting:** The study includes data on demographics, diagnoses, surgery, medications, and  
20  
21 37 healthcare services from five national registries. Data were retrieved from 14 years before  
22  
23 38 until 1 year after the amputation. Descriptive statistics were used to describe progression of  
24  
25 39 diseases and use of medication and healthcare services.  
26

27  
28 40 **Participants:** An unselected cohort of patients ( $\geq 50$  yrs;  $n=2883$ ) subjected to a primary  
29  
30 41 non-traumatic lower extremity amputation in 2010 or 2011 in Denmark.  
31

32 42 **Results:** The prevalence of atherosclerosis, hypertension and diabetes was 70%, 53% and  
33  
34 43 49%, respectively. Among patients with atherosclerosis, 42 % had not received cholesterol-  
35  
36 44 lowering treatment even though 87% had visited their general practitioner within the last year  
37  
38 45 prior to amputation. Further, 16% were diagnosed with diabetes at the time of the  
39  
40 46 amputation. The prevalence of cardiovascular diseases increased from 22% to 70%,  
41  
42 47 atherosclerosis from 5% to 53%, and diabetes from 17% to 35% over the 14 years preceding  
43  
44 48 major amputation. Of all patients, 64% had been in contact with the hospital or out-patient  
45  
46 49 clinics within the last three years and 34% had received a prescription of opioids within the  
47  
48 50 last year prior to the amputation.  
49

50  
51 51 **Conclusion:** Among patients with non-traumatic lower extremity amputation, one third live  
52  
53 52 with undiagnosed and untreated atherosclerosis and one sixth suffer from undiagnosed  
54  
55 53 diabetes despite continuous contacts to general practitioner and the hospital. This study  
56  
57  
58  
59  
60

1  
2  
3  
4  
5  
6  
7  
8  
9  
10  
11  
12  
13  
14  
15  
16  
17  
18  
19  
20  
21  
22  
23  
24  
25  
26  
27  
28  
29  
30  
31  
32  
33  
34  
35  
36  
37  
38  
39  
40  
41  
42  
43  
44  
45  
46  
47  
48  
49  
50  
51  
52  
53  
54  
55  
56  
57  
58  
59  
60

54 emphasizes a need for enhanced focus, among both hospital clinicians and general  
55 practitioners, on the early identification of atherosclerosis and diabetes.

56 **Keywords** Lower extremity amputation, Atherosclerosis, Diabetes, Healthcare services

For peer review only

1  
2  
3 57 **Article Summary**  
4  
5

6 58 **Article focus**  
7  
8  
9

- 10 • Patients who undergo non-traumatic lower extremity amputation (LEA) are characterised  
11 by high age, multi-morbidity, polypharmacy and high mortality.  
12  
13  
14  
15 • To ensure early identification of patients at risk of LEA, we need to gain more knowledge  
16 about the development and progression of LEA-related diseases.  
17  
18  
19

20  
21 63 **Key messages**  
22  
23

- 24 • One third of patients with LEA were living with undiagnosed and untreated  
25 atherosclerosis and one out of six were living with undiagnosed diabetes despite regular  
26 contact with their GPs and outpatient clinics for several years prior to amputation  
27  
28  
29  
30  
31  
32 • Atherosclerosis is the primary comorbidity among patients undergoing major extremity  
33 amputations. For the majority of patients, the major LEA is a first-time amputation.  
34  
35  
36  
37  
38 • Clinicians are encouraged to supplement medical treatment of cardiovascular diseases,  
39 including pain treatment, with a careful inspection of the patient's feet as this non-  
40 invasive examination may detect insufficient circulation.  
41  
42  
43  
44

45 72 **Strengths and limitations of the study**  
46  
47

- 48  
49 • The strengths of this national registry study were the inclusion of data describing  
50 diagnoses and use of medication and healthcare services during the last 14 years  
51 preceding non-traumatic LEA performed in Denmark.  
52  
53  
54  
55  
56  
57  
58  
59  
60

- 1  
2  
3 76 • The main limitation was the lack of a control group. An age-, sex-, and geographically-  
4  
5 77 matched control group would have allowed differentiation between disease progression  
6  
7 78 due to aging and disease progression leading to amputation. An inherent limitation was  
8  
9 79 that the data did not allow an estimation of patient compliance with the prescribed  
10  
11 80 medication.

12  
13  
14 81 **Abbreviations**

15  
16  
17 82 LEA: lower extremities amputation

18  
19 83 Major LEA: Lower extremity amputation performed above the ankle level

20  
21 84 Minor LEA: Lower extremity amputation performed below the ankle level

22  
23  
24 85 AKA: Above knee amputation

25  
26 86 BKA: Below knee amputation

27  
28  
29 87 PAD: Peripheral artery disease

30  
31 88 GP: General practitioner  
32  
33  
34  
35  
36  
37  
38  
39  
40  
41  
42  
43  
44  
45  
46  
47  
48  
49  
50  
51  
52  
53  
54  
55  
56  
57  
58  
59  
60

## 89 Introduction

90 Lower extremity amputation (LEA) is a severe event associated with loss of mobility, pain,  
91 decreased quality of life, major disfigurement, and increased risk of re-amputation and  
92 hospitalisation (1–3). Even though the incidence of LEA has decreased worldwide over the  
93 last two decades, large variations persist; from 5.8 to 31 per 10<sup>5</sup> individuals in different  
94 populations (4). Moreover, the reported one-year mortality rate was 12% to 58% (5–8), and  
95 the highest mortality rate (45%–58%) was associated with above-the-knee amputations  
96 (AKA) (9,10). Age and the severity of comorbidities are the most prominent prognostic  
97 factors for mortality after LEA (6,7).

98 The most prevalent comorbidities in patients with LEA are atherosclerosis and diabetes  
99 (4,11,12). Among all major amputations, approximately 50–90% are related to peripheral  
100 artery disease (PAD), 20–80% are related to diabetes, and 10% to trauma (13). During the  
101 last decade, the global prevalence of PAD has increased by 23%, with the highest increase  
102 among low-income countries (14). The risk factors for PAD are age, smoking, history of  
103 cardiovascular diseases, diabetes, hypertension, dyslipidaemia, and obesity (15). To our  
104 knowledge, only one previous study has investigated the progression of LEA-related  
105 diseases by examining the use of medication over a seven-year period prior to amputation  
106 among patients diagnosed with diabetes (16). Buckley et al. recommended an earlier referral  
107 to a medical specialist to prevent LEA. Currently, the estimated global prevalence of  
108 diabetes is 9% and 90% is characterised as type 2 diabetes (17). Furthermore, the  
109 prevalence of diabetes is estimated to increase by 55% over the next twenty years, which  
110 represents 10% of the global population. Nevertheless, the risk of amputation remains high,  
111 and some patients remain undiagnosed until it is too late to prevent LEA (18). In a cohort of  
112 patients with diabetes, 18% had a cardiovascular disease with PAD being most prevalent  
113 (19). Among patients diagnosed with both diabetes and PAD, the risk of amputation is 1.5  
114 times higher than in patients diagnosed with PAD alone and five times higher than in



1  
2  
3 115 patients only diagnosed with diabetes (20). To ensure early identification of patients at risk of  
4  
5 116 amputation, we need more knowledge about the progression of LEA-related diseases. This  
6  
7 117 knowledge is reflected in the historic use of medication and the need for healthcare services  
8  
9 118 across all groups of patients with LEAs. The aim of this study was to examine the  
10  
11 119 progression of LEA-related diseases. We examined the use of medication and the number of  
12  
13 120 contacts with healthcare services during the 14 years leading up to LEAs, in an unselected  
14  
15 121 population of all Danish patients that underwent LEAs. With these data, we also studied the  
16  
17 122 associations between LEA-related diseases and the one-year prognosis after the LEA  
18  
19  
20  
21  
22  
23  
24  
25  
26  
27  
28  
29  
30  
31  
32  
33  
34  
35  
36  
37  
38  
39  
40  
41  
42  
43  
44  
45  
46  
47  
48  
49  
50  
51  
52  
53  
54  
55  
56  
57  
58  
59  
60

123

1  
2  
3 124 **Methods**  
4

5  
6 125 **Setting**  
7

8 126 The Danish healthcare system is tax-funded and offers free and equal access to medical  
9  
10 127 care. All citizens have a general practitioner (GP) who provides referrals to specialists and  
11  
12 128 hospital treatments. The GPs are responsible for their patients' medical treatment.  
13  
14 129 Prescribed medications and other healthcare services, such as a physiotherapy etc., are  
15  
16 130 partly tax-funded, with a differential out-of-pocket fee.  
17

18  
19 131 **Study design and data sources**  
20

21  
22 132 We included data from the following five nationwide registries: (1) The National Patient  
23  
24 133 Registry (NPR) which contains information on hospitalisations, including visits to outpatient  
25  
26 134 clinics and emergency rooms (21), surgical procedures, coded according to the Nordic  
27  
28 135 Classification of Surgical Procedures (NCSP), and diagnoses coded according to the  
29  
30 136 International Classification of Diseases (ICD-10); (2) The National Prescription Registry  
31  
32 137 contains information on prescribed medications picked up at the pharmacy (22). Medications  
33  
34 138 are coded according to the global Anatomical Therapeutic Chemical (ATC) classification  
35  
36 139 system; (3) The Danish National Health Service Registry for Primary Care (NHSR) contains  
37  
38 140 information on all contacts with GPs, including out-of-hours care from GPs and practising  
39  
40 141 medical specialists(23); (4) The Danish Civil Registration System (CRS) contains information  
41  
42 142 on gender, date of birth, vital status, spouses and residents, (24); (5) The Attainment  
43  
44 143 Registry contains data on education level. All Danish citizens are registered with a unique  
45  
46 144 personal identification number (CPR number), which allows linkage with all nationwide  
47  
48 145 registries at an individual level. All data were provided by Statistics Denmark  
49  
50 146 (<http://www.danmarksstatistik.dk/en>).  
51  
52  
53  
54  
55  
56  
57  
58  
59  
60

1  
2  
3 147 ***Study cohort***  
4

5 148 We included patients who had undergone at least one of the following surgical procedures,  
6  
7 149 performed between the 1st of January 2010 and 31st of December 2011: hip-exarticulation,  
8  
9 150 trans-femoral amputation (i.e., Above-knee amputation [BKA]); knee disarticulation or trans-  
10  
11 151 tibial amputation (i.e., below-the-knee amputation [BKA]); ankle or foot amputation; or toe  
12  
13 152 amputation. See supplementary materials for detailed information. To eliminate trauma-  
14  
15 153 related amputations, we excluded patients with a trauma diagnosis recorded at any time  
16  
17 154 prior to the amputation. We also excluded foreign patients without a CPR number and  
18  
19 155 patients below 18 years of age. Furthermore, to ensure homogeneity within the groups, we  
20  
21 156 defined an index amputation as the first surgical amputation performed as an AKA, BKA,  
22  
23 157 ankle-, foot- or toe amputation in 2010 and 2011.  
24  
25

26  
27 158 ***Categorisation of amputation procedures***  
28

29 159 For patients who received more than one amputation procedure on the same day, the most  
30  
31 160 severe procedure was identified and was used for analysis. The severity of different types of  
32  
33 161 amputations (based on surgical codes) was ranked from the most severe procedure as hip-  
34  
35 162 exarticulation and transfemoral amputation to the least severe as a toe amputation  
36  
37 163 procedure. Detailed description is present in the supplementary material. When patients had  
38  
39 164 both a left- and right-side amputation code on the same day, the procedure was categorised  
40  
41 165 as a bilateral amputation.  
42  
43

44 166 The definition of the index amputation was based on the surgical amputation procedures and  
45  
46 167 was divided into the following four groups: AKA, BKA, foot/ankle amputation, and toe  
47  
48 168 amputation. AKA and BKA were classified as major amputations, and foot/ankle or toe  
49  
50 169 amputations were classified as minor amputations.  
51  
52  
53  
54  
55  
56  
57  
58  
59  
60

1  
2  
3 170 ***Demographics, comorbidities, medications, and contacts with healthcare services***  
4

5 171 For each patient, we retrieved cumulative registry information on the education level, living  
6  
7 172 conditions, socioeconomic status, place of residence, diagnoses, prescribed medications,  
8  
9 173 contacts with healthcare services, re-amputations, and death, which had been recorded  
10  
11 174 between 01.01.1997 and 31.12.2012. The Elixhauser Comorbidity Index was used to identify  
12  
13 175 the progression of comorbidities over the 14 years prior to amputation. The Index included  
14  
15 176 31 pre-defined comorbidities; however, in this study, we combined the pre-defined codes for  
16  
17 177 uncomplicated and complicated diabetes and hypertension (34). To describe comorbidity,  
18  
19 178 the Elixhauser Comorbidity Index was supplemented with ICD-10 codes for atherosclerosis.  
20  
21 179 Further subgroups were created, including atherosclerosis in the lower extremities, diabetic  
22  
23 180 neuropathy, retinopathy, nephropathy foot ulcer, other ulcers-not related to diabetes, stroke,  
24  
25 181 emboli, bone cancer, and arthrosis, see supplementary material. The severity of the  
26  
27 182 comorbidity identified at the time of the index amputation was evaluated with the Charlson  
28  
29 183 Comorbidity index (25). We divided the patients into three groups, according to the Charlson  
30  
31 184 Comorbidity index: 0-1, 2, and 3+, where a higher score predicted a higher risk of mortality.  
32  
33 185 The prescribed medications were defined as medications that were picked up from the  
34  
35 186 pharmacy at least once each year. The prescribed medications were grouped according to  
36  
37 187 ACT codes (see Table 2). The coding and the classifications of drugs were defined by the  
38  
39 188 authors and validated by consensus agreement among three pharmacists who did not  
40  
41 189 participate in the study. See supplementary material.  
42  
43  
44

45 190 The NPR registry contains only information on diagnoses recorded during hospitalisation,  
46  
47 191 and not by GPs. Therefore, central diseases were defined by combining the prevalence of  
48  
49 192 the medication (ACT- codes) collected from the pharmacy with the registered diagnosis  
50  
51 193 (ICD-10 codes) from hospitals: diabetes<sup>comb</sup>, atherosclerosis<sup>comb</sup>, cardiovascular diseases<sup>comb</sup>  
52  
53 194 and hypertension<sup>comb</sup> (see supplementary material). A visit to a GP was defined as a show-  
54  
55 195 up at the GP clinic and visits to outpatient clinics included only clinics at the hospitals.  
56  
57  
58  
59  
60

1  
2  
3 196 **Ethical approval**

4  
5 197 This register-based study included only anonymous data from national registries and had no  
6  
7 198 patient contact. The scientific board of Statistics Denmark and “Statens Serum Institut”  
8  
9 199 approved the study (project no 704122).

10  
11 200 **Statistics**

12  
13  
14 201 Descriptive data, comorbidities, and the use of medication for each of the amputation groups  
15  
16 202 (AKA, BKA, and minor amputation) were expressed as frequencies with percentages, for  
17  
18 203 categorical data, or as median and intraquartile range (IQR = 25th to 75th percentile) for  
19  
20 204 continuous data. A comparison between major (AKA and BKA) and minor amputations was  
21  
22 205 made with a  $\chi^2$  test, for categorical data, and a Kruskal Wallis test for continuous data.  
23  
24 206 Diagnoses and relevant medications were compared for atherosclerosis, diabetes, and  
25  
26 207 hypertension. The prevalence of diagnoses and use of medications over time are depicted  
27  
28 208 as graphs of the proportions of patients with a given disease, and the proportion that used a  
29  
30 209 given medication, respectively. The difference in prevalence over time is expressed as  
31  
32 210 percent point (pp). The data analysis was performed with SAS 9.4, and the cumulative  
33  
34 211 incidence plots were constructed with R 3.2.2. Graphs of the progression over time were  
35  
36 212 created with GraphPad Prism 6.07, and the flowchart was created in Power Point 2010. P-  
37  
38 213 values less than 5% were considered significant.

40  
41 214

42 215  
43  
44  
45  
46  
47  
48  
49  
50  
51  
52  
53  
54  
55  
56  
57  
58  
59  
60

1  
2  
3 216 **Results**  
4

5  
6 217 A total of 3375 patients underwent an LEA in Denmark during 2010 and 2011. Of these, 4%  
7  
8 218 required LEAs due to trauma, and were excluded from the cohort (Figure 1). Additionally,  
9  
10 219 352 patients (11%) were excluded, due to a previous amputation on the same or opposite  
11  
12 220 leg, at the same or a higher level. A total of 2883 patients fulfilled the criteria for undergoing  
13  
14 221 an index amputation during 2010 and 2011. Major amputations were performed in 1782  
15  
16 222 patients (62%), and minor amputations were performed in 1101 patients (38%). Patient  
17  
18 223 characteristics are presented in Table 1. Among patients with major amputations, 1562  
19  
20 224 (88%) had not received previous amputations. Among the 266 patients with previous  
21  
22 225 amputations (on a lower level), 101 patients (38%) were bilaterally amputated.  
23

24  
25 226 ***Comorbidities and medical treatment in the year of amputation***  
26

27  
28 227 Patient diagnoses and current medications that were recorded at the time of the index  
29  
30 228 amputation are presented in Table 2 and 3. Both diabetes and atherosclerosis were  
31  
32 229 diagnosed in 32% of patients (577/1782) with major amputations and 35% of patients  
33  
34 230 (382/1101) with minor amputations. Furthermore, among patients diagnosed with  
35  
36 231 atherosclerosis, 42% (851/2017) had not received cholesterol-lowering drugs at the time of  
37  
38 232 amputation. The absence of cholesterol-lowering treatment was observed significantly more  
39  
40 233 among patients with major amputations than among those with minor amputations, (46%  
41  
42 234 (650/1428) vs 34% (201/589);  $p < 0.001$ ). Among the 1407 patients diagnosed with diabetes,  
43  
44 235 225 patients (16%) did not at any time receive insulin or blood glucose-lowering drugs  
45  
46 236 preceding the amputation. The absence of antidiabetic treatment prior to the amputation was  
47  
48 237 observed significantly more often among patients with major amputations than among  
49  
50 238 patients with minor amputations (19% (134/697) vs 13% (91/710),  $p < .001$ ).  
51

52  
53 239  
54  
55  
56  
57  
58  
59  
60

1  
2  
3 240 ***Disease progression and medications during the 14 years prior to amputation***  
4

5 241 Figure 2 shows the gradual increases in the proportion of patients with the most common  
6  
7 242 diagnoses (atherosclerosis, diabetes, and hypertension) recorded during hospitalisations  
8  
9 243 and the medications used (including antithrombotic agents, cholesterol-lowering treatments,  
10  
11 244 antidiabetic drugs, and antihypertensive therapies) during the 14 years prior to the  
12  
13 245 amputation. Among patients undergoing major amputations, the prevalence of  
14  
15 246 atherosclerosis increased from 2% to 20% over the first 13 years, and a 58 pp increase was  
16  
17 247 observed during the last year preceding the amputation. During the 14 years, the use of  
18  
19 248 cholesterol-lowering drugs increased from 3% to 50%. There was a 28 pp difference  
20  
21 249 between patients diagnosed with atherosclerosis who received cholesterol-lowering  
22  
23 250 treatment or not prior to the amputation. Furthermore, the use of antithrombotic drugs  
24  
25 251 increased from 15% to 65% during the first 13 years, and the use further increased by 6  
26  
27 252 percent point in the last year (Figure 2a). Among patients with minor amputations, the  
28  
29 253 prevalence of diabetes increased from 8% to 40%, and antidiabetic treatments increased  
30  
31 254 from 29% to 55%. During the last year, the prevalence of diabetes increased by 21 percent  
32  
33 255 point, and the gap between treatment and diagnosis was only 3 percent point prior to minor  
34  
35 256 amputation (Figure 2b).

36  
37  
38  
39 257 Antihypertensive treatments increased from 23% to 60% during the first 13 years, and then  
40  
41 258 dropped slightly, by 4 percent point, in the last year prior to a major amputation. Similarly,  
42  
43 259 antihypertensive treatments increased from 20% to 64% over the 14 years prior to minor  
44  
45 260 amputations (Figure 2c). The use of beta blocking agents increased from 10% to 41% prior  
46  
47 261 to major amputations and from 8% to 38% prior to minor amputations.

48  
49  
50 262 The estimated disease progressions, calculated as the combination of the diagnosis  
51  
52 263 prevalence and the medication prevalence, are presented in Figure 3. The progression of  
53  
54 264 diseases prior to a major amputation increased as follows: atherosclerosis<sup>comb</sup> increased  
55  
56 265 from 5% to 53% during the 14 years, with a 16 percent point increase in the last five years  
57  
58  
59  
60

1  
2  
3 266 preceding amputation; hypertension<sup>comb</sup> increased from 23% to 63%; cardiovascular  
4  
5 267 diseases<sup>comb</sup> increased from 22% to 70%; and diabetes<sup>comb</sup> increased from 17% to 35%. The  
6  
7 268 use of opioids increased from 10% to 45%, with an 18 percent point increase the last five  
8  
9 269 years prior to amputation. Further, 32% received prescribed opioids three years prior to  
10  
11 270 major amputation (Figure 3a). Among patients with minor amputations, the prevalence of  
12  
13 271 atherosclerosis<sup>comb</sup> increased from 3% to 51% during the 14 years; cardiovascular  
14  
15 272 diseases<sup>comb</sup> increased from 16% to 63%; hypertension<sup>comb</sup> increased from 20% to 66%; and  
16  
17 273 diabetes increased from 29% to 57%. The use of opioids increased from 9% to 34%, with a  
18  
19 274 12 percent point increase in the last five years (Figure 3b).

20  
21  
22 275

#### 23 24 25 276 ***Contacts made to hospitals and GPs during the 14 years prior to amputation***

26  
27 277 Patients' visits to the healthcare system (hospitals, outpatient clinics, and GPs) during the 14  
28  
29 278 years prior to amputation are presented in Figure 4. 98% of the patients contacted  
30  
31 279 healthcare services at least once during the last year prior to amputation. The proportion of  
32  
33 280 patients that contacted their GPs increased from 85% to 97% during the 14 years prior to  
34  
35 281 amputation. The mean number of visits to GPs each year increased from 4.5 to 7.7 visits per  
36  
37 282 year. The proportion of patients that visited outpatient clinics increased from 25% to 76%,  
38  
39 283 and the mean number of visits to outpatient clinics per year increased from 0.4 to 3.2 visits.  
40  
41 284 The number of hospitalisations increased from 17% to 49%. During the last year prior to  
42  
43 285 amputation, 2% of the patients had no contact with GPs or hospitals, 1% had only contacted  
44  
45 286 hospitals, and 18% had only contacted GPs.

46  
47  
48 287 Among 851 patients diagnosed with arteriosclerosis without receiving cholesterol-lowering  
49  
50 288 drugs at any time prior to the amputation, 87% had visited their GP, 29% had called out-of-  
51  
52 289 hours care, 47% had been hospitalised, 70% had visited outpatient clinics, and 29% had  
53  
54 290 visited the emergency room during the last year prior to amputation.

55  
56  
57 291  
58  
59  
60



1  
2  
3 292 ***Cumulative incidences of death and re-amputation***  
4

5 293 Figure 5 shows the cumulative incidences of death and re-amputation for first year after  
6  
7 294 LEA. The hazard ratios for death the first year after an AKA (compared to foot/ankle  
8  
9 295 amputation) were 4.41 (95%CI: 3.44-5.66,  $p<0.001$ ) with no adjustments, 3.39 (95%CI: 2.64-  
10  
11 296 4.37,  $p<0.001$ ) after adjusting for demographics (sex, age, and living conditions), and 4.0  
12  
13 297 (95%CI: 3.09-5.19,  $p<0.001$ ) after also adjusting for co-morbidities (diabetes,  
14  
15 298 arteriosclerosis, hypertension, and use of opioids). The hazard ratios for death the first year  
16  
17 299 after a BKA (compared to foot/ankle amputation) were 2.57 (95%CI: 1.97-3.19,  $p<0.001$ )  
18  
19 300 without adjustments, 2.28 (95%CI: 1.75-2.97,  $p<0.001$ ) after adjusting for demographics,  
20  
21 301 and 2.39 (95%CI: 1.83-3.13,  $p<0.001$ ) after also adjusting for co-morbidity.  
22  
23

24 302 The hazard ratios for re-amputation the first year after an AKA were 4.16 (95%CI: 3.24-5.34,  
25  
26 303  $p<0.001$ ) without adjustments, 3.20 (95%CI: 2.49-4.13,  $p<0.001$ ) after adjusting for  
27  
28 304 demographics, and 3.69 (95%CI: 2.85-4.79,  $p<0.001$ ) after also adjusting for co-morbidity.  
29

30 305 The hazard ratios for death the first year after a BKA were 2.64 (95%CI: 2.02-3.43,  $p<0.001$ )  
31  
32 306 without adjustments, 2.34 (95%CI: 1.79-3.05,  $p<0.001$ ) after adjusting for demographics,  
33  
34 307 and 2.4 (95%CI: 1.83-3.14,  $p<0.001$ ) after also adjusting for co-morbidity.  
35  
36

37  
38 308  
39  
40  
41  
42  
43  
44  
45  
46  
47  
48  
49  
50  
51  
52  
53  
54  
55  
56  
57  
58  
59  
60

1  
2  
3 309 **Discussion**  
4  
5

6 310 This study showed that the prevalence of atherosclerosis was 70% and the prevalence of  
7  
8 311 diabetes was 49% in an unselected national cohort of patients undergoing LEAs. Of the  
9  
10 312 patients with atherosclerosis, 42% had not received cholesterol-lowering treatments,  
11  
12 313 although 87% of these patients had visited their GP at least once during the last year prior to  
13  
14 314 amputation. Additionally, 16% of the patients with diabetes were diagnosed with diabetes the  
15  
16 315 year of the amputation. The majority of patients (85%) had at least one GP contact per year  
17  
18 316 throughout the 14 years prior to amputation, and 64% were in contact with a hospital  
19  
20 317 outpatient clinic three years prior to amputation. Another important finding was that 88% of  
21  
22 318 patients undergoing major extremity amputations had no previous amputations on a lower  
23  
24 319 level. Moreover, only 6% of patients in this cohort had undergone revascularisation prior to  
25  
26 320 amputation. Nevertheless, one out of three patients received prescribed opioids three years  
27  
28 321 prior to amputation.  
29

30  
31 322 Traditionally, LEA has primarily been associated with long-term complications to diabetes.  
32  
33 323 However, the prevalence of cardiovascular diseases has increased in western countries;  
34  
35 324 consequently, the traditional perceptions must be redefined to identify risk factors for LEA. In  
36  
37 325 our unselected national cohort of patients with major amputations, the majority (83%) was  
38  
39 326 diagnosed with atherosclerosis, and a smaller proportion had diabetes (33%). In  
40  
41 327 comparison, patients with minor amputations had a higher prevalence of diabetes (64%) and  
42  
43 328 lower prevalence of atherosclerosis (53%). Similar distributions were also identified by The  
44  
45 329 Global Lower Extremity Amputation Study Group, 2000 (13). Further, we also found a 28  
46  
47 330 percent point difference between the proportion of patients who received cholesterol-  
48  
49 331 lowering drugs and the proportion of patients diagnosed with atherosclerosis. Also, among  
50  
51 332 patients with diabetes there was a six percent point gap between patients having diabetes  
52  
53 333 and patients receiving anti-diabetic treatment, indicating an unsolved clinical problem in  
54  
55 334 identifying atherosclerosis and diabetes. Indeed, timely treatment might have saved these  
56  
57  
58  
59  
60

1  
2  
3 335 patients from a extremity amputation. The lack of recognition of symptoms related to PAD  
4  
5 336 among both patients and health care professionals may be related to a lack of knowledge  
6  
7 337 that inhibited patients to react on symptoms and consult their GP in time (26). However, the  
8  
9 338 increased use of prescribed opioids in the years leading up to the amputation could indicate  
10  
11 339 the presence of PAD, all though we have no information on the indication for the  
12  
13 340 prescription. This study supports the conclusion made by Jones et al. that calls for education  
14  
15 341 programs to focus on prevention and early identification to ensure adequate treatment for  
16  
17 342 preventing LEA (5).

18  
19  
20 343 In this study, few patients had a history of minor amputations performed prior to the major  
21  
22 344 index amputation; 89% and 85% of patients with AKA and BKA, respectively, had no history  
23  
24 345 of previous amputation preceding the first-time major amputations. Heyer et al. reported that  
25  
26 346 92 % of their patients had no previous amputation based on data from health insurance  
27  
28 347 companies (12) and Buckley et al. found that 28% of a selected cohort of patients with  
29  
30 348 diabetes had a history of amputations (16). Further, Currran et al. reported that 61% had a  
31  
32 349 history of either revascularisation or amputation based on data from a surgeon database (3).

33  
34 350 In this study, only 6% of the patients had received revascularisations (angioplasty or bypass)  
35  
36 351 prior to the index amputation. These results were surprising as revascularisation surgery is  
37  
38 352 still considered one of the central treatment strategies for critical ischaemia in lower  
39  
40 353 extremities (27,28). Similarly, Moxey et al. found a 9% prevalence of revascularisation in an  
41  
42 354 unselected, nationwide cohort (29). However, Ahmad et al. found a 30% prevalence of  
43  
44 355 revascularisation in an unselected population cohort in England (11). Ahmad et al. also  
45  
46 356 demonstrated demographic variations in the prevalence of amputations and  
47  
48 357 revascularisations, which were associated with social inequalities and the presence of  
49  
50 358 chronic diseases in some geographical regions. The finding that one third of patients  
51  
52 359 received intensive pain treatment already three years prior to major amputation indicate  
53  
54 360 symptoms of ischaemia, which appear several years prior to amputation. Thus, it is essential  
55  
56 361 that leg pain should be recognised as a symptom of PAD to ensure that patients are referred  
57  
58  
59  
60

1  
2  
3 362 to specialists (30). In Denmark, the ankle and toe blood pressures are measured to  
4  
5 363 calculate the Ankle-Brachial index (ABI) (31), a non-invasive diagnostic test for PAD (32).  
6  
7 364 This procedure is mainly performed in hospitals, and rarely by the GP. The majority of  
8  
9 365 patients' maintained regular and increasing contact with their GPs, thus, early identification  
10  
11 366 might be feasible, because patients do seek medical advice in the years prior to the  
12  
13 367 amputation. Furthermore, our results showed that 63% of patients were also in regular  
14  
15 368 contact with outpatient clinics at hospitals already three years before the amputation, and  
16  
17 369 they increasingly (from 32% to 49%) underwent hospitalisation during the last years  
18  
19 370 preceding amputation. Buckley et al. followed patients with diabetes for seven years prior to  
20  
21 371 LEA, and concluded a need for early referral to specialists to reduce risk of LEA (16). Our  
22  
23 372 study found that the majority (76%) of patients visited the out-patient clinic and as such is  
24  
25 373 accessible for early identification. It has been suggested that PAD screening could be  
26  
27 374 performed with non-invasive methods, like the ABI (33); . Other studies have indicated that  
28  
29 375 routine screening could promote preventive treatment, and that a screening strategy could  
30  
31 376 cost-effectively prevent the progression of PAD and cardiovascular events (34,35).  
32  
33 377 Alternatively, Brand (36) and Boulton et al. (37) have suggested that a simple clinical  
34  
35 378 examination of a patient's feet could indicate a need for further test to identify PAD. Thus,  
36  
37 379 treatment could be initiated (including specialist referrals) to prevent ulcers due to ischaemia,  
38  
39 380 and thus, prevent LEA.  
40  
41  
42  
43 381 The present study confirmed that the risk of re-amputation increased after minor  
44  
45 382 amputations, and that the risk of death was highest among patients who required AKAs. In  
46  
47 383 contrast, neither demographics nor comorbidities could explain the low chance of survival.  
48  
49 384 Thus, other factors must affect the outcome after LEA, such as the general health status and  
50  
51 385 the nutritional status of a patient. In addition, factors related to the perioperative treatment,  
52  
53 386 like the delay to surgery, could have a negative impact on the outcome (38). Similar results  
54  
55  
56  
57  
58  
59  
60

1  
2  
3 387 were reported by Jones et al., Hoffstad et al., and Wiessman et al., who called for more  
4  
5 388 comprehensive, multidisciplinary efforts (5,7,10).  
6  
7  
8 389 The strength of this study was the use of an unselected, nationwide cohort based on the  
9  
10 390 national registry, which maintained information recorded over a period of 14 years prior to  
11  
12 391 the amputation. Furthermore, we could crosslink data in various registries at an individual  
13  
14 392 level, which made it possible to follow patients over time. The main limitation was the lack of  
15  
16 393 a control group. An age-, sex-, and geographically-matched control group could allow  
17  
18 394 differentiation between disease progression due to aging and disease progression that leads  
19  
20 395 to amputation. Furthermore, this type of comparison could also reveal inequalities in  
21  
22 396 healthcare services, as has been shown in other countries (11). An inherent limitation was  
23  
24 397 that the data did not allow an estimation of patient compliance with the prescribed  
25  
26 398 medication. Further, it was not possible to access the diagnosis recorded by the GP, as  
27  
28 399 these data are not included in the national registry nor the indication for the prescribed  
29  
30 400 medication as this has just recently been included in the registry.  
31  
32

33 401

## 36 402 **Conclusion**

37  
38 403 Atherosclerosis is the primary comorbidity followed by hypertension and diabetes in this  
39  
40 404 unselected cohort of patients undergoing major extremity amputation. In this study, one third  
41  
42 405 of patients with LEA were living with undiagnosed or untreated atherosclerosis and one out  
43  
44 406 of six were living with undiagnosed diabetes despite a regular contact with their GPs and  
45  
46 407 outpatient clinics for several years prior to the amputation. For the majority of patients  
47  
48 408 undergoing major LEAs, the amputation was a first-time amputation. Additionally, only a  
49  
50 409 small number of patients underwent extremity-saving procedures, although one in three had  
51  
52 410 received opioid prescriptions several years before the amputation. The overall findings of  
53  
54 411 this study suggest that the need of opioids, combined with the presence of hypertension,  
55  
56 412 diabetes, or another cardiovascular disease, could be an indication of PAD which is highly  
57  
58  
59  
60

1  
2  
3 413 associated with lower extremity amputation. Further, clinicians are encouraged to initiate  
4  
5 414 medical treatment supplemented with a careful inspection of the patient's feet as this non-  
6  
7 415 invasive examination may detect an early indication of low circulation.  
8  
9

10 416  
11 417  
12  
13  
14  
15  
16  
17  
18  
19  
20  
21  
22  
23  
24  
25  
26  
27  
28  
29  
30  
31  
32  
33  
34  
35  
36  
37  
38  
39  
40  
41  
42  
43  
44  
45  
46  
47  
48  
49  
50  
51  
52  
53  
54  
55  
56  
57  
58  
59  
60

For peer review only

1  
2  
3 418 **Acknowledgements**

4  
5 419 We acknowledge the contribution from Research Services, Statistics Denmark for  
6  
7 420 management and access to registry data and thank Jørn K Petersen for his assistance. We  
8  
9 421 especially thank Nasrin Faqir, for her contribution to data management and analysis.

10  
11 422 **Competing interest**

12  
13 423 We have read and understood BMJ policy on declaration of interests and declare that we  
14  
15 424 have no competing interests

16  
17  
18 425 **Funding**

19  
20 426 This study was funded by The Novo Nordic Foundation grant number NNF12OC0002017,  
21  
22 427 and Copenhagen University Hospital, Hvidovre Research Foundation. None of the sponsors  
23  
24 428 were involved in the design of the study and collection, analysis, and interpretation of data  
25  
26 429 and in writing the manuscript.

27  
28  
29 430 **Consent for publication**

30  
31 431 Not applicable

32  
33  
34 432 **Data sharing statement**

35  
36 433 The datasets supporting the conclusions of this article are available in the Statistics  
37  
38 434 Denmark, <http://www.dst.dk/>. Statistics Denmark managed and provided the secured access  
39  
40 435 In according to Danish regulations, data are available by applying Statistics Denmark.

41  
42  
43 436 **Author contributors**

44  
45 437 SJ and JP describe the idea behind the study. PSJ and OA applied for funding to the study.  
46  
47 438 PSJ, JP, KKM, IP and OA signed the study. PSJ and JP applied for data at Statistics  
48  
49 439 Denmark. PSJ and JP provided the statistical expertise. IP, KKM and OA provided the  
50  
51 440 clinical and medical expertise. PSJ and JP performed the data management and analysis.  
52  
53 441 All authors helped interpret the data. The accuracy of data and analysis was reviewing by all  
54  
55 442 authors who can take responsibility for the integrity of the data and the accuracy of the data

1  
2  
3 443 analysis. PSJ drafted the manuscript. All authors reviewed and critically revised the  
4  
5 444 manuscript for intellectual content and approved the final version of the manuscript.  
6  
7  
8 445  
9  
10  
11  
12  
13  
14  
15  
16  
17  
18  
19  
20  
21  
22  
23  
24  
25  
26  
27  
28  
29  
30  
31  
32  
33  
34  
35  
36  
37  
38  
39  
40  
41  
42  
43  
44  
45  
46  
47  
48  
49  
50  
51  
52  
53  
54  
55  
56  
57  
58  
59  
60

For peer review only



446 **References**

- 447 1. Suckow BD, Goodney PP, Nolan BW, Veeraswamy RK, Gallagher P, Cronenwett JL, et  
448 al. Domains that Determine Quality of Life in Vascular Amputees. *Ann Vasc Surg.* 2015  
449 May;29(4):722–30.
- 450 2. Ries Z. Incidence, Risk Factors, and Causes for Thirty-Day Unplanned Readmissions  
451 Following Primary Lower-Extremity Amputation in Patients with Diabetes. *JBJS J Bone  
452 Jt Surg.* 2015;97(21):1774–80.
- 453 3. Curran T, Zhang JQ, Lo RC, Fokkema M, McCallum JC, Buck DB, et al. Risk factors  
454 and indications for readmission after lower extremity amputation in the American  
455 College of Surgeons National Surgical Quality Improvement Program. *J Vasc Surg.*  
456 2014 Nov;60(5):1315–24.
- 457 4. Moxey PW, Gogalniceanu P, Hinchliffe RJ, Loftus IM, Jones KJ, Thompson MM, et al.  
458 Lower extremity amputations—a review of global variability in incidence. *DiabetMed*  
459 [Internet]. 2011 Mar 9;(1464–5491 (Electronic)). Available from: PM:21388445
- 460 5. Jones WS, Patel MR, Dai D, Vemulapalli S, Subherwal S, Stafford J, et al. High  
461 mortality risks after major lower extremity amputation in Medicare patients with  
462 peripheral artery disease. *Am Heart J.* 2013 May;165(5):809–815, 815.e1.
- 463 6. Scott SWM, Bowrey S, Clarke D, Choke E, Bown MJ, Thompson JP. Factors  
464 influencing short- and long-term mortality after lower limb amputation. *Anaesthesia.*  
465 2014 Mar;69(3):249–58.
- 466 7. Hoffstad O, Mitra N, Walsh J, Margolis DJ. Diabetes, Lower-Extremity Amputation, and  
467 Death. *Diabetes Care.* 2015 Oct;38(10):1852–7.
- 468 8. Hoffmann M, Kujath P, Flemming A, Proß M, Begum N, Zimmermann M, et al. Survival  
469 of diabetes patients with major amputation is comparable to malignant disease. *Diab*  
470 *Vasc Dis Res.* 2015 Jul;12(4):265–71.
- 471 9. Rosen N. Mortality and reoperations following lower limb amputations. *Isr Med Assoc J.*  
472 2014;16(2):83–7.
- 473 10. Wiessman MP, Liberty IF, Segev RW, Katz T, Abu Tailakh M, Novack V. Clinical  
474 characteristics and survival of patients with diabetes mellitus following non-traumatic  
475 lower extremity amputation. *Isr Med Assoc J IMAJ.* 2015 Mar;17(3):145–9.
- 476 11. Ahmad N, Thomas GN, Gill P, Chan C, Torella F. Lower limb amputation in England:  
477 prevalence, regional variation and relationship with revascularisation, deprivation and  
478 risk factors. A retrospective review of hospital data. *J R Soc Med.* 2014 Nov  
479 11;141076814557301.
- 480 12. Heyer K, Debus ES, Mayerhoff L, Augustin M. Prevalence and Regional Distribution of  
481 Lower Limb Amputations from 2006 to 2012 in Germany: A Population based Study.  
482 *Eur J Vasc Endovasc Surg Off J Eur Soc Vasc Surg.* 2015 Sep 22;
- 483 13. Unwin N, Airey M, Williams R, Bodanskt J, Chell S. Epidemiology of lower extremity  
484 amputation in centres in Europe, North America and East Asia. The Global Lower  
485 Extremity Amputation Study Group. *BrJSurg.* 2000 Mar;87(0007–1323 (Print)):328–37.

- 1  
2  
3 486 14. Fowkes FGR, Rudan D, Rudan I, Aboyans V, Denenberg JO, McDermott MM, et al.  
4 487 Comparison of global estimates of prevalence and risk factors for peripheral artery  
5 488 disease in 2000 and 2010: a systematic review and analysis. *Lancet Lond Engl*. 2013  
6 489 Oct 19;382(9901):1329–40.
- 7  
8 490 15. Criqui MH, Aboyans V. *Epidemiology of Peripheral Artery Disease*. *Circ Res*. 2015 Apr  
9 491 24;116(9):1509–26.
- 10  
11 492 16. Buckley CM, Ali F, Roberts GA, Kearney PM, Perry IJ, Bradley CP. Timing of access to  
12 493 secondary healthcare services and lower extremity amputations in patients with  
13 494 diabetes: a case-control study. *BMJ Open Diabetes Res Care*. 2015;3(1):e000069.
- 14  
15 495 17. Organisation mondiale de la santé. *Global status report on noncommunicable diseases*  
16 496 *2014: attaining the nine global noncommunicable diseases targets; a shared*  
17 497 *responsibility*. Geneva: World Health Organization; 2014.
- 18  
19 498 18. Halter JB, Musi N, McFarland Horne F, Crandall JP, Goldberg A, Harkless L, et al.  
20 499 *Diabetes and cardiovascular disease in older adults: current status and future*  
21 500 *directions*. *Diabetes*. 2014 Aug;63(8):2578–89.
- 22  
23 501 19. Dinesh Shah A, Langenberg C, Rapsomaniki E, Denaxas S, Pujades-Rodriguez M,  
24 502 Gale CP, et al. Type 2 diabetes and incidence of a wide range of cardiovascular  
25 503 diseases: a cohort study in 1.9 million people. *Lancet Lond Engl*. 2015 Feb 26;385  
26 504 Suppl 1:S86.
- 27  
28 505 20. Humphries MD. *Amputation Risk in Patients with Diabetes Mellitus and Peripheral*  
29 506 *Artery Disease Using Statewide Data*. *Ann Vasc Surg*. 2016;30:123–31.
- 30  
31 507 21. Lynge E, Sandegaard JL, Rebolj M. *The Danish National Patient Register*. *Scand J*  
32 508 *Public Health*. 2011 Jul 1;39(7 suppl):30–3.
- 33  
34 509 22. Kildemoes HW, Sørensen HT, Hallas J. *The Danish National Prescription Registry*.  
35 510 *Scand J Public Health*. 2011 Jul 1;39(7 suppl):38–41.
- 36  
37 511 23. Andersen JS, Olivarius NDF, Krasnik A. *The Danish National Health Service Register*.  
38 512 *Scand J Public Health*. 2011 Jul 1;39(7 suppl):34–7.
- 39  
40 513 24. Pedersen CB. *The Danish Civil Registration System*. *Scand J Public Health*. 2011  
41 514 Jul;39(7 Suppl):22–5.
- 42  
43 515 25. Charlson ME, Pompei P, Ales KL, MacKenzie CR. *A new method of classifying*  
44 516 *prognostic comorbidity in longitudinal studies: development and validation*. *J Chronic*  
45 517 *Dis*. 1987;40(5):373–83.
- 46  
47 518 26. Swaminathan A, Vemulapalli S, Patel MR, Jones WS. *Lower extremity amputation in*  
48 519 *peripheral artery disease: improving patient outcomes*. *Vasc Health Risk Manag*.  
49 520 2014;10:417–24.
- 50  
51 521 27. Moxey PW, Hofman D, Hinchliffe RJ, Poloniecki J, Loftus IM, Thompson MM, et al.  
52 522 *Volume-outcome relationships in lower extremity arterial bypass surgery*. *Ann Surg*.  
53 523 2012 Dec;256(6):1102–7.
- 54  
55 524 28. *Society for Vascular Surgery Lower Extremity Guidelines Writing Group, Conte MS,*  
56 525 *Pomposelli FB, Clair DG, Geraghty PJ, McKinsey JF, et al. Society for Vascular*  
57 526 *Surgery practice guidelines for atherosclerotic occlusive disease of the lower*

1  
2  
3  
4  
5  
6  
7  
8  
9  
10  
11  
12  
13  
14  
15  
16  
17  
18  
19  
20  
21  
22  
23  
24  
25  
26  
27  
28  
29  
30  
31  
32  
33  
34  
35  
36  
37  
38  
39  
40  
41  
42  
43  
44  
45  
46  
47  
48  
49  
50  
51  
52  
53  
54  
55  
56  
57  
58  
59  
60

- 527 extremities: management of asymptomatic disease and claudication. *J Vasc Surg*.  
528 2015 Mar;61(3 Suppl):2S–41S.
- 529 29. Moxey PW, Hofman D, Hinchliffe RJ, Jones K, Thompson MM, Holt PJE.  
530 Epidemiological study of lower limb amputation in England between 2003 and 2008. *Br*  
531 *J Surg*. 2010 Sep;97(9):1348–53.
- 532 30. Papia G, Mayer P, Kelton D, Queen D, Elliott JA, Kuhnke JL. Just leg pain? Think  
533 again What health leaders must know about peripheral arterial disease. *Healthc*  
534 *Manage Forum*. 2015 Nov 1;28(6 suppl):S5–9.
- 535 31. Sillesen H. Peripheral artery disease (PAD) screening in the asymptomatic population:  
536 why, how, and who? *Curr Atheroscler Rep*. 2011;13(5):390–5.
- 537 32. Beard JD. ABC of arterial and venous disease: Chronic lower limb ischaemia. *BMJ*.  
538 2000 Mar 25;320(7238):854–7.
- 539 33. Sillesen H, Falk E. Why not screen for subclinical atherosclerosis? *Lancet Lond Engl*.  
540 2011 Aug 20;378(9792):645–6.
- 541 34. Sigvant B, Henriksson M, Lundin F, Wahlberg E. Asymptomatic peripheral arterial  
542 disease: is pharmacological prevention of cardiovascular risk cost-effective? *Eur J*  
543 *Cardiovasc Prev Rehabil Off J Eur Soc Cardiol Work Groups Epidemiol Prev Card*  
544 *Rehabil Exerc Physiol*. 2011 Apr;18(2):254–61.
- 545 35. Vaidya A, Joore MA, Ten Cate-Hoek AJ, Ten Cate H, Severens JL. Screen or not to  
546 screen for peripheral arterial disease: guidance from a decision model. *BMC Public*  
547 *Health*. 2014;14:89.
- 548 36. Brand PW. Tenderizing the foot. *Foot Ankle Int*. 2003;24(6):457–61.
- 549 37. Boulton AJM, Vileikyte L, Ragnarson-Tennvall G, Apelqvist J. The global burden of  
550 diabetic foot disease. *Lancet Lond Engl*. 2005 Nov 12;366(9498):1719–24.
- 551 38. Moxey PW, Hofman D, Hinchliffe RJ, Poloniecki J, Loftus IM, Thompson MM, et al.  
552 Delay influences outcome after lower limb major amputation. *Eur J Vasc Endovasc*  
553 *Surg Off J Eur Soc Vasc Surg*. 2012 Nov;44(5):485–90.
- 554

Table 1. Characteristics of patients with lower extremity amputations in 2010-2011 in Denmark

|                                            | Total<br>N (%) | Major amputation    |                     | Minor amputation |
|--------------------------------------------|----------------|---------------------|---------------------|------------------|
|                                            |                | Above-Knee<br>N (%) | Below-Knee<br>N (%) | N (%)            |
| n                                          | n=2883         | n = 1024            | n=758               | n=1101           |
| <b>Gender</b>                              |                |                     |                     |                  |
| Male                                       | 1811 (63)      | 544 (53)            | 489 (65)            | 778 (71)         |
| <b>Age</b>                                 |                |                     |                     |                  |
| Men, median (IQR)                          | 69 (61;79)     | 74 (66;82)          | 70 (60;78)          | 66 (58;76)       |
| Women, median (IQR)                        | 78 (68;86)     | 81 (72;87)          | 78 (68;85)          | 72 (63;82)       |
| <b>Social status<sup>1</sup></b>           |                |                     |                     |                  |
| Married <sup>2</sup>                       | 1165 (40)      | 378 (37)            | 307 (41)            | 480 (44)         |
| Divorced                                   | 937 (32)       | 293 (29)            | 247 (33)            | 397 (36)         |
| Widow                                      | 767 (27)       | 352 (34)            | 200 (26)            | 217 (20)         |
| <b>Economic status</b>                     |                |                     |                     |                  |
| Working                                    | 257 (9)        | 24 (2)              | 62 (8)              | 171 (16)         |
| Retired                                    | 2055 (71)      | 845 (83)            | 534 (71)            | 676 (61)         |
| Social welfare                             | 571 (20)       | 155 (15)            | 162 (21)            | 254 (23)         |
| <b>Living arrangement</b>                  |                |                     |                     |                  |
| Living alone                               | 1514 (53)      | 595 (58)            | 402 (53)            | 517 (47)         |
| Living in rural areas                      | 1705 (59)      | 634 (62)            | 431 (57)            | 640 (58)         |
| <b>Education</b>                           |                |                     |                     |                  |
| < 9 year of school                         | 2549 (88)      | 896 (88)            | 662 (87)            | 999 (90)         |
| <b>Charlson Index</b>                      |                |                     |                     |                  |
| 0-1                                        | 546 (19)       | 196 (19)            | 133 (17)            | 217 (20)         |
| 2                                          | 456 (16)       | 217 (21)            | 105 (14)            | 134 (12)         |
| 3                                          | 1881 (65)      | 611 (60)            | 520 (69)            | 750 (68)         |
| <b>Multi-morbidities and Polypharmacy</b>  |                |                     |                     |                  |
| Co-morbidities <sup>3</sup> , median (IQR) | 7 (5;9)        | 6 (5;9)             | 7 (5;10)            | 7 (4;9)          |
| Drugs <sup>4</sup> , median (IQR)          | 7 (5;9)        | 7 (5;9)             | 7 (5;9)             | 6 (4;8)          |
| <b>Peripheral vascular procedure</b>       |                |                     |                     |                  |
| Angioplasty                                | 89 (3)         | 7 (1)               | 4 (1)               | 78 (7)           |
| Bypass graft                               | 97 (3)         | 5 (0,5)             | 4 (1)               | 88 (8)           |
| <b>Surgery history</b>                     |                |                     |                     |                  |
| Previous amputation                        | 266 (9)        | 113 (11)            | 107 (14)            | 46 (4)           |
| < 3 amputations                            | 203 (7)        | 84 (8)              | 76 (14)             | 43 (4)           |
| ≥ 3 amputations                            | 63 (2)         | 29 (3)              | 31 (4)              | 3 (-)            |

Values represent the number of patients (%), unless indicated otherwise. <sup>1</sup>Missing n=12. <sup>2</sup>Married or residing with a partner. <sup>3</sup>All ICD10 diagnoses. <sup>4</sup>ACTcodes for main groups

Table 2. Prevalence of comorbidity among patients with lower extremity amputations in 2010-2011 in Denmark

|                                      | Major amputations |            |            | Minor amputations |          |
|--------------------------------------|-------------------|------------|------------|-------------------|----------|
|                                      | Total, N (%)      | Above Knee | Below Knee | Total, N (%)      | P value* |
|                                      |                   | n (%)      | n (%)      |                   |          |
|                                      | N=1782            | N=1024     | N=758      | N=1101            |          |
| Peripheral Vascular Disorders        | 1481 (83)         | 873 (85)   | 608 (80)   | 625 (57)          | <.0001   |
| Atherosclerosis <sup>1</sup>         | 1428 (80)         | 844 (82)   | 584 (77)   | 589 (54)          | <.0001   |
| Hypertension <sup>2</sup>            | 902 (51)          | 577 (56)   | 441 (58)   | 599 (54)          | .18      |
| Diabetes <sup>2</sup>                | 697 (39)          | 331 (32)   | 366 (48)   | 710 (64)          | <.0001   |
| Diabetic foot ulcer <sup>3</sup>     | 505 (18)          | 224 (22)   | 281 (37)   | 522 (47)          | <.0001   |
| Neuropathy <sup>3</sup>              | 174 (6)           | 69 (7)     | 105 (14)   | 230 (21)          | <.0001   |
| Retinopathy <sup>3</sup>             | 112 (6)           | 37 (4)     | 75 (10)    | 141 (13)          | <.0001   |
| Nephropathy <sup>3</sup>             | 85 (5)            | 22 (2)     | 63 (8)     | 82 (7)            | .0028    |
| Cardiac ischaemia <sup>3</sup>       | 597 (34)          | 348 (34)   | 249 (33)   | 329 (30)          | .04      |
| Cardiac Arrhythmia                   | 536 (30)          | 319 (31)   | 215 (28)   | 232 (21)          | <.0001   |
| Cerebrovascular disease <sup>4</sup> | 540 (30)          | 317 (31)   | 223 (29)   | 195 (18)          | <.0001   |
| Congestive Heart Failure             | 401 (23)          | 228 (22)   | 173 (23)   | 191 (17)          | .0009    |
| Stroke <sup>3</sup>                  | 401 (23)          | 234 (23)   | 167 (22)   | 144 (13)          | <.0001   |
| Arthrosis <sup>3</sup>               | 320 (18)          | 202 (20)   | 118 (16)   | 195 (18)          | .86      |
| Chronic Pulmonary Diseases           | 356 (20)          | 227 (22)   | 129 (17)   | 129 (12)          | <.0001   |
| Fluid & electrolyte disorders        | 330 (19)          | 211 (21)   | 119 (16)   | 123 (11)          | <.0001   |
| Emboli <sup>3</sup>                  | 359 (20)          | 231 (23)   | 128 (17)   | 88 (8)            | <.0001   |
| Renal Failure                        | 252 (14)          | 129 (13)   | 123 (16)   | 133 (12)          | .11      |
| Tumor without Metastasis             | 243 (14)          | 143 (14)   | 100 (13)   | 107 (10)          | .0018    |
| Alcohol addiction                    | 227 (13)          | 121 (12)   | 106 (14)   | 122 (11)          | .18      |
| Obesity                              | 130 (7)           | 60 (6)     | 70 (9)     | 127 (12)          | .0001    |
| Rheumatoid Arthritis                 | 139 (8)           | 77 (8)     | 62 (8)     | 90 (8)            | .71      |
| Depression                           | 124 (7)           | 77 (8)     | 47 (6)     | 58 (5)            | .069     |
| Dementia <sup>5</sup>                | 110 (6)           | 69 (7)     | 43 (6)     | 37 (3)            | .0006    |
| Liver disease                        | 79 (4)            | 40 (4)     | 39 (5)     | 51 (5)            | .80      |
| Metastatic Cancer                    | 50 (3)            | 36 (3)     | 14 (2)     | 9 (1)             | .0002    |
| Weight loss                          | 43 (2)            | 30 (3)     | 13 (2)     | 12 (1)            | .0155    |
| Bone Cancer <sup>3</sup>             | 24 (1)            | 14 (1)     | 10 (1)     | 2 (-)             | .0013    |

\*P<0.05, major vs. minor amputation. Comorbidity, defined according to Elixhauser Comorbidity index;<sup>1</sup> includes only ICD10- I170; <sup>2</sup> includes uncomplicated and complicated conditions; <sup>3</sup> not included in the Elixhauser Comorbidity index; <sup>4</sup> included from the Charlson Comorbidity index

556  
557  
558

Table 3. Prevalence of prescribed medications used by patients with lower extremity amputations in 2010-2011 in Denmark

|                            | Major amputations |            |            | Minor amputations |          |
|----------------------------|-------------------|------------|------------|-------------------|----------|
|                            | Total, N (%)      | Above Knee | Below Knee | Total, N (%)      | P value* |
|                            |                   | n (%)      | n (%)      |                   |          |
|                            | N=1782            | N=1024     | N=758      | N=1101            |          |
| Opioids                    | 1484 (83)         | 876 (86)   | 608 (80)   | 684 (62)          | <.0001   |
| Antithrombotic drugs       | 1262 (71)         | 738 (72)   | 524 (69)   | 711 (65)          | .0005    |
| Acetaminophen              | 1333 (75)         | 802 (78)   | 531 (70)   | 621 (56)          | <.0001   |
| Antihypertensives          | 1000 (56)         | 577 (56)   | 423 (56)   | 715 (65)          | <.0001   |
| Cholesterol-lowering drugs | 886 (50)          | 481 (47)   | 405 (53)   | 627 (57)          | .0002    |
| Neuropathic pain relievers | 919 (52)          | 517 (50)   | 402 (53)   | 330 (30)          | <.0001   |
| Antidepressants            | 864 (48)          | 501 (49)   | 363 (48)   | 365 (33)          | <.0001   |
| Antidiabetic therapy       | 588 (33)          | 268 (26)   | 320 (42)   | 638 (58)          | <.0001   |
| Beta blockers              | 760 (43)          | 440 (43)   | 320 (42)   | 439 (40)          | 0.14     |
| NSAID                      | 451 (25)          | 264 (26)   | 187 (25)   | 312 (28)          | 0.07     |
| Drugs for airway disease   | 337 (19)          | 199 (19)   | 138 (18)   | 146 (14)          | <.0001   |
| Alcohol addiction          | 341 (19)          | 198 (20)   | 143 (19)   | 122 (11)          | <.0001   |
| Smoking cessation          | 259 (15)          | 155 (15)   | 104 (14)   | 132 (12)          | .053     |
| Cortisol                   | 246 (14)          | 156 (15)   | 90 (12)    | 120 (11)          | .023     |

\*P<0.05, major vs. minor amputation

559  
560

1  
2  
3 561 **Figures titles and legends**

4 562  
5 563 **Figure 1**

6 564  
7 565 Title: Figure 1. Flowchart shows study selection of patients with lower extremity amputations  
8  
9 566 between 01.01.2010 -31.12.2011 in Denmark

10  
11 567 Legends: (1) Excluded due to previous amputation define as amputation on the same level  
12  
13 568 or bilateral amputation on a higher level than the index amputation in 2010-11; (2) include  
14  
15 569 hip-exarticulation; (3) include knee disarticulation.

16  
17 570  
18 571 **Figure 2**

19 572  
20 573 Title: Figure 2. The prevalence of comorbidities and prescribed medications during the 14  
21  
22 574 years preceding major and minor lower extremity amputations.

23  
24 575 **Figure 3**

25 576  
26 577 Title: Figure 3. 14 years of estimated progression of chronic diseases preceding (a) major  
27  
28 578 and (b) minor lower extremity amputations.

29  
30 579 Legends: The prevalence of comorbidities, defined by both ICD-10 coding and the use of  
31  
32 580 prescribed medications (ACT code), was estimated each year.

33  
34 581  
35 582 **Figure 4**

36  
37 583 Title: Figure 4. Contacts with the healthcare system during the 14 years preceding lower  
38  
39 584 extremity amputation. Patients are grouped according to (a) major amputations, and (b)  
40  
41 585 minor amputations

42  
43 586 **Figure 5**

44  
45 587 Title: Figure 5. One-year cumulative outcomes. The cumulative probabilities of (*left*) re-  
46  
47 588 amputation procedures and (*right*) survival are shown for patients that received major (AKA  
48  
49 589 and BKA) and minor lower extremity amputations

50  
51 590  
52 591  
53  
54  
55  
56  
57  
58  
59  
60

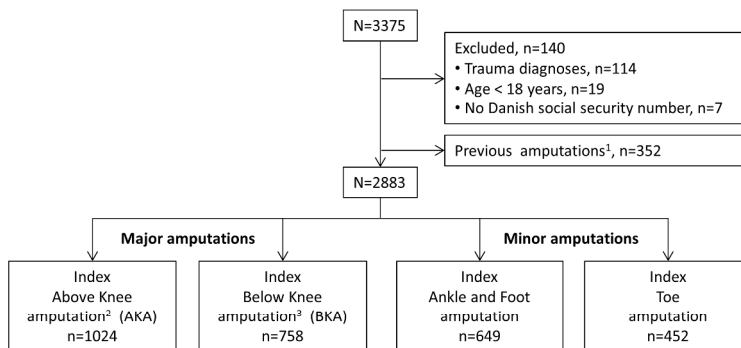

Figure 1. Flowchart shows study selection of patients with lower extremity amputations between 01.01.2010 -31.12.2011 in Denmark

Legends: (1) Excluded due to previous amputation define as amputation on the same level or bilateral amputation on a higher level than the index amputation in 2010-11; (2) include hip-exarticulation; (3) include knee disarticulation.

254x190mm (300 x 300 DPI)

only



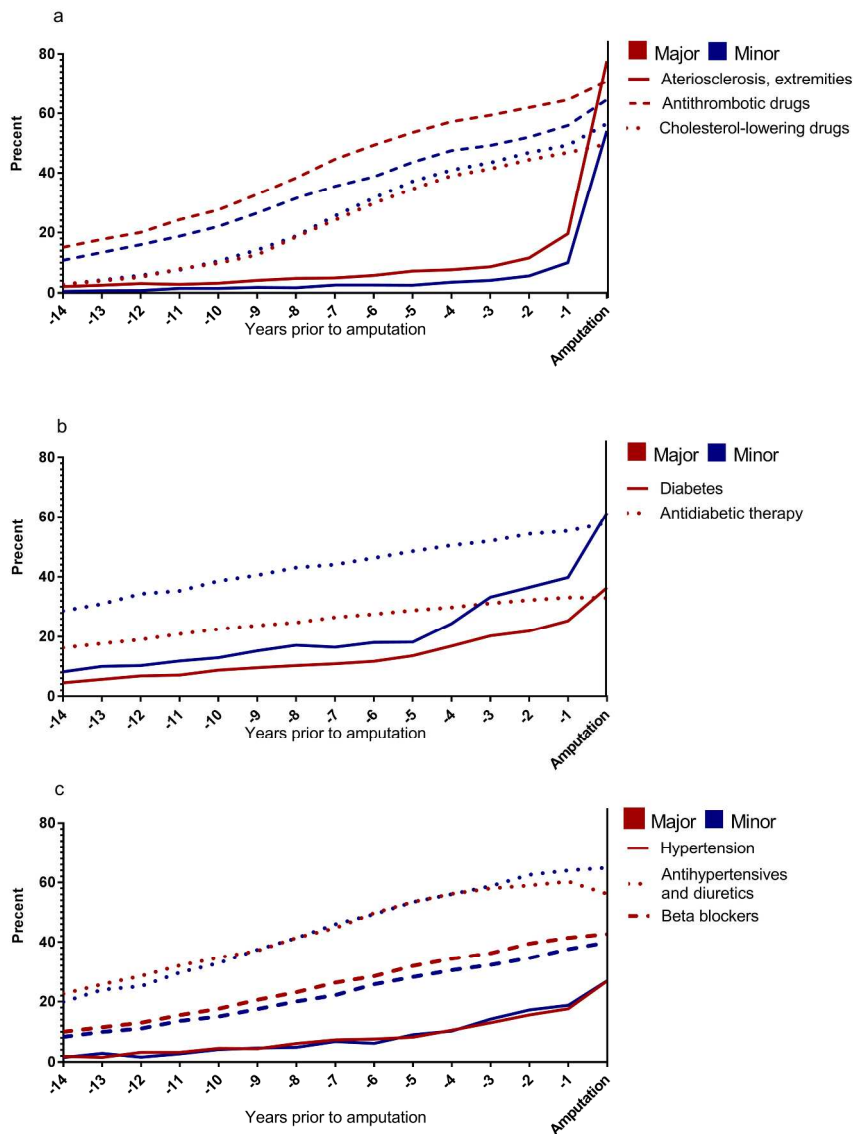

Figure 2. The prevalence of comorbidities and prescribed medications during the 14 years preceding major and minor lower extremity amputations.

242x299mm (300 x 300 DPI)

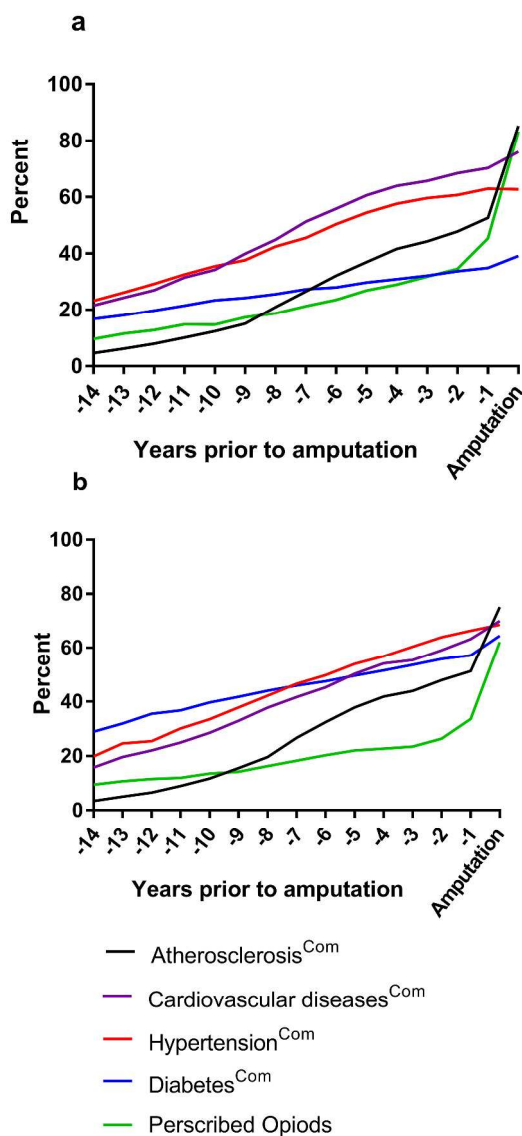

Figure 3. 14 years of estimated progression of chronic diseases preceding (a) major and (b) minor lower extremity amputations. The prevalence of comorbidities, defined by both ICD-10 coding and the use of prescribed medications (ACT code), was estimated each year.

293x570mm (300 x 300 DPI)

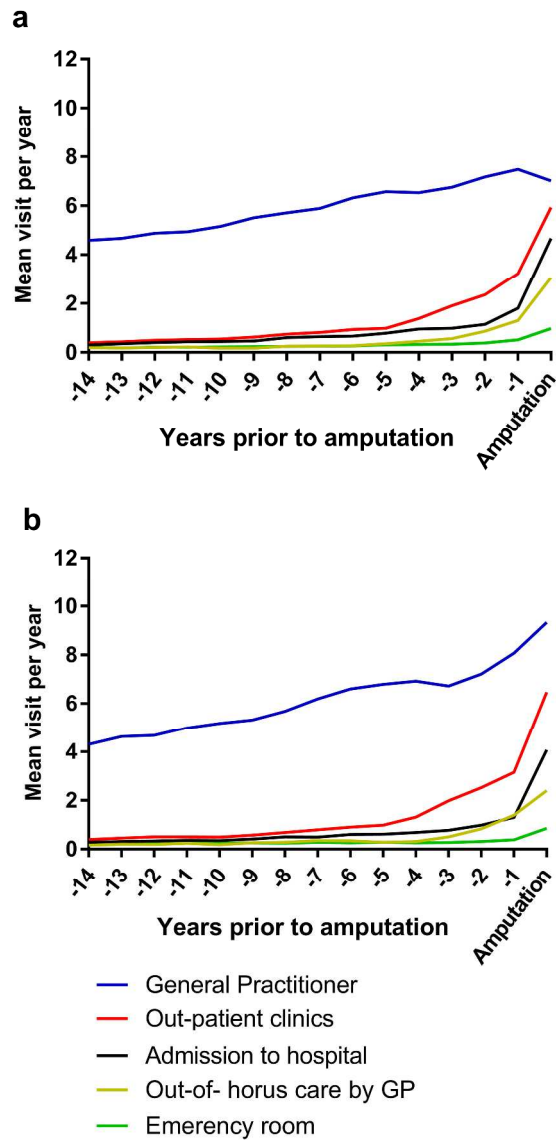

Figure 4. Contacts with the healthcare system during the 14 years preceding lower extremity amputation. Patients are grouped according to (a) major amputations, and (b) minor amputations

219x402mm (300 x 300 DPI)

1  
2  
3  
4  
5  
6  
7  
8  
9  
10  
11  
12  
13  
14  
15  
16  
17  
18  
19  
20  
21  
22  
23  
24  
25  
26  
27  
28  
29  
30  
31  
32  
33  
34  
35  
36  
37  
38  
39  
40  
41  
42  
43  
44  
45  
46  
47  
48  
49  
50  
51  
52  
53  
54  
55  
56  
57  
58  
59  
60

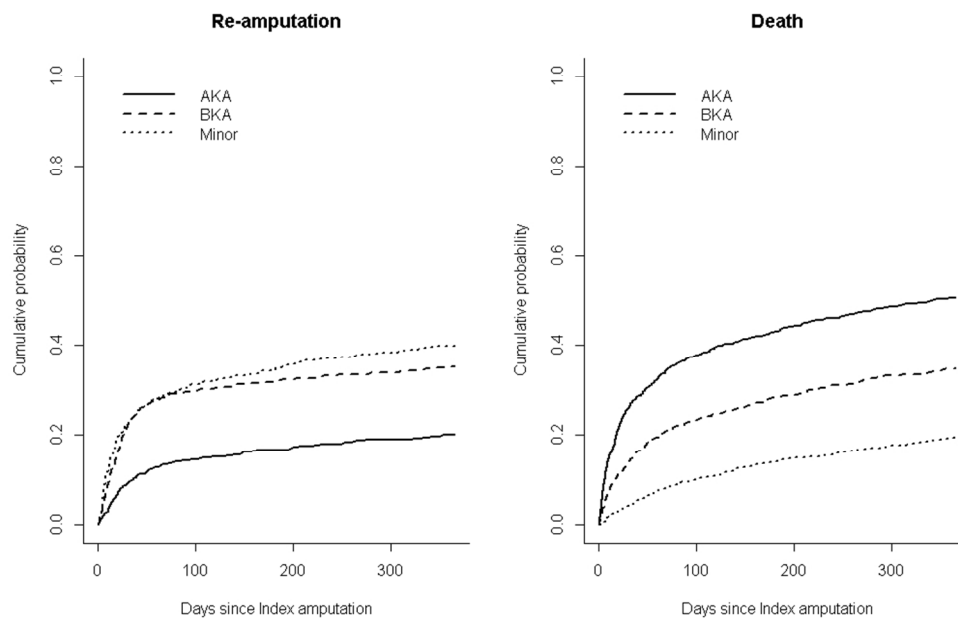

Title!! + Figure 5. One-year cumulative outcomes. The cumulative probabilities of (left) re-amputation procedures and (right) survival are shown for patients that received major (AKA and BKA) and minor lower extremity amputations

365x239mm (72 x 72 DPI)

ew only

Progression of disease preceding lower extremity amputation: A longitudinal registry study of diagnoses, use of medication and healthcare services 14 years prior to amputation

## Supplementary material

### SKS codes for surgical procedure, identification of index amputation

#### Above Knee Amputation (AKA)

|                          |                  |
|--------------------------|------------------|
| Hip-exarticulation       | (KNFQ09)         |
| Trans-Femoral amputation | (KNFQ19, KNFQ99) |

#### Below Knee Amputation (BKA)

|                          |                         |
|--------------------------|-------------------------|
| Knee disarticulation     | (KNGQ09)                |
| Trans-Tibial amputation  | (KNGQ19, KNGQ99)        |
| Ankle or foot amputation | (KNHQ00-08)             |
| Toe amputation           | (KNHQ10-18, KNHQ 90-99) |

### Rank of amputation procedure

|                                                                                                              |                          |
|--------------------------------------------------------------------------------------------------------------|--------------------------|
| 1. Hip-exarticulation                                                                                        | (KNFQ09)                 |
| 2. Trans-Femoral amputation                                                                                  | (KNFQ19, KNFQ99)         |
| 3. Knee disarticulation                                                                                      | (KNGQ09)                 |
| 4. Trans-Tibial amputation                                                                                   | (KNGQ19, KNGQ99)         |
| 5. Ankle and foot amputation                                                                                 | (KNHQ10-18, KNHQ 90-99)  |
| 6. Revision of stump or related amputation procedure after Hip-exarticulation or<br>Trans-Femoral amputation | (KNFQ29, KNFQ39, KNFQ49) |
| 7. Revision of stump or related procedure after Knee disarticulation or<br>Trans-Tibial amputation           | (KNGQ29, KNGQ39, KNGQ49) |
| 8. Toe amputation                                                                                            | (KNHQ00-08)              |
| 9. Stump revision of foot, ankle<br>or toe amputation                                                        | (KNHQ20-28)              |

Progression of disease preceding lower extremity amputation: A longitudinal registry study of diagnoses, use of medication and healthcare services 14 years prior to amputation

#### ICD10 code for diagnosis

|                              |                                           |
|------------------------------|-------------------------------------------|
| Atherosclerosis              | DI70                                      |
| Atherosclerosis, extremities | D1702                                     |
| Diabetes                     |                                           |
| Neuropathy                   | DE104, DE114, DE124, DE134, DE144         |
| Retinopathy                  | DE103, DE113, DE123, DE133, DE143         |
| Nephropathy                  | DE102, DE122, DE132, DE142                |
| Foot ulcer                   | DE105, DE115, DE125, DE135, DE145         |
| Ulcer                        | DI97, DL88, DI89, DL984, DS91, DR02, DL02 |
| Apoplexia                    | DI60, DI61, DI62, DI63, DI64              |
| Emboli                       | DI80, DI81, DI82, DI74                    |
| Bone cancer                  | DC40, DC41, DC49                          |
| Arthrosis                    | DM15, DM16, DM17, DM18, DM19              |

#### ACT codes for medication

|                                  |                                            |
|----------------------------------|--------------------------------------------|
| Antidiabetic therapy             |                                            |
| Insulins                         | A10A                                       |
| Blood Glucose lowering drugs     | A10B                                       |
| Antithrombotic drugs             | B01A                                       |
| Drugs for hypertension           |                                            |
| Antihypertensives                | C02DB, C02CA, C08, C09                     |
| Diuretics, Thiazides, plan       | C03AA - Eller hele gruppen C03 Diuretics ? |
| Beta blockers                    | C07                                        |
| Cholesterol-lowering drugs       | C10AA, C10AB, C10AD, C10AX, C10B           |
| Corticosteroids for systemic use | H02A                                       |
| Obstructive airway disease       | R03                                        |
| Opioids                          | N02A                                       |

Progression of disease preceding lower extremity amputation: A longitudinal registry study of diagnoses, use of medication and healthcare services 14 years prior to amputation

|                             |                     |
|-----------------------------|---------------------|
| Codeine                     | R05DA04             |
| Acetaminophen               | N02B                |
| NSAID                       | M01A                |
| Neuropathic pain relievers  |                     |
| Antiepileptics drugs        | N03AX               |
| Antidepressants             | N06AA, N06AX        |
| Drugs for alcohol addiction | N07BB, N03AA, N05BA |
| Drugs for smoking cessation | N07BA, N06AX,       |

### Codes used to estimate the progression of diseases over 14 years prior to amputation by combining diagnosis and prescribed medication

#### *Atherosclerosis<sup>Com</sup>*

|                            |                                           |
|----------------------------|-------------------------------------------|
| Arteriosclerosis           | ICD code DI70                             |
| Cholesterol-lowering drugs | ACT code C10AA, C10AB, C10AD, C10AX, C10B |

#### *Diabetes<sup>Com</sup>*

|                      |                                       |
|----------------------|---------------------------------------|
| Diabetes             | ICD code DE10, DE11, DE12, DE13, DE14 |
| Antidiabetic therapy | ACT code A10A, A10B                   |

#### *Cardiovascular diseases<sup>Com</sup>*

|                                               |                                              |
|-----------------------------------------------|----------------------------------------------|
| Cardiac ischemia                              | ICD code DI20, DI21, DI22, DI23, DI24, DI25, |
| Congestive heart failure, cardiac arrhythmia, | Elx_GRP_1, ELX_GRP_2                         |
| Beta blockers, Antithrombotic drugs           | ACT code C07, B01A                           |

#### *Hypertension<sup>Com</sup>*

|                        |                                        |
|------------------------|----------------------------------------|
| Hypertension           | ICD code DI10, DI11, DI12, DI13, DI,15 |
| Drugs for hypertension | ACT code C02DB, C02CA, C03AA, C08, C09 |

#### *Prescribed opioids*

|                   |                        |
|-------------------|------------------------|
| ACT code, opioids | ACT code N02A, R05DA04 |
|-------------------|------------------------|

STROBE 2007 (v4) Statement—Checklist of items that should be included in reports of *cohort studies*

| Section/Topic                | Item # | Recommendation                                                                                                                                                                       | Reported on page # |
|------------------------------|--------|--------------------------------------------------------------------------------------------------------------------------------------------------------------------------------------|--------------------|
| Title and abstract           | 1      | (a) Indicate the study's design with a commonly used term in the title or the abstract                                                                                               | Title page, p 2    |
|                              |        | (b) Provide in the abstract an informative and balanced summary of what was done and what was found                                                                                  | p 2                |
| <b>Introduction</b>          |        |                                                                                                                                                                                      |                    |
| Background/rationale         | 2      | Explain the scientific background and rationale for the investigation being reported                                                                                                 | page 6             |
| Objectives                   | 3      | State specific objectives, including any prespecified hypotheses                                                                                                                     | Page 6,7           |
| <b>Methods</b>               |        |                                                                                                                                                                                      |                    |
| Study design                 | 4      | Present key elements of study design early in the paper                                                                                                                              | Page 8             |
| Setting                      | 5      | Describe the setting, locations, and relevant dates, including periods of recruitment, exposure, follow-up, and data collection                                                      | Page 8, 9          |
| Participants                 | 6      | (a) Give the eligibility criteria, and the sources and methods of selection of participants. Describe methods of follow-up                                                           | Page 9             |
|                              |        | (b) For matched studies, give matching criteria and number of exposed and unexposed                                                                                                  |                    |
| Variables                    | 7      | Clearly define all outcomes, exposures, predictors, potential confounders, and effect modifiers. Give diagnostic criteria, if applicable                                             | Page 10            |
| Data sources/<br>measurement | 8*     | For each variable of interest, give sources of data and details of methods of assessment (measurement). Describe comparability of assessment methods if there is more than one group | Page 10            |
| Bias                         | 9      | Describe any efforts to address potential sources of bias                                                                                                                            |                    |
| Study size                   | 10     | Explain how the study size was arrived at                                                                                                                                            | Page 9             |
| Quantitative variables       | 11     | Explain how quantitative variables were handled in the analyses. If applicable, describe which groupings were chosen and why                                                         | Page 10,11         |
| Statistical methods          | 12     | (a) Describe all statistical methods, including those used to control for confounding                                                                                                | Page 11            |
|                              |        | (b) Describe any methods used to examine subgroups and interactions                                                                                                                  | Page 11            |
|                              |        | (c) Explain how missing data were addressed                                                                                                                                          |                    |
|                              |        | (d) If applicable, explain how loss to follow-up was addressed                                                                                                                       |                    |
|                              |        | (e) Describe any sensitivity analyses                                                                                                                                                |                    |
| <b>Results</b>               |        |                                                                                                                                                                                      |                    |



|                          |     |                                                                                                                                                                                                                                                                                                                                                                                                               |                     |
|--------------------------|-----|---------------------------------------------------------------------------------------------------------------------------------------------------------------------------------------------------------------------------------------------------------------------------------------------------------------------------------------------------------------------------------------------------------------|---------------------|
| Participants             | 13* | (a) Report numbers of individuals at each stage of study—eg numbers potentially eligible, examined for eligibility, confirmed eligible, included in the study, completing follow-up, and analysed<br>(b) Give reasons for non-participation at each stage<br>(c) Consider use of a flow diagram                                                                                                               | Page 12, (Figure 1) |
| Descriptive data         | 14* | (a) Give characteristics of study participants (eg demographic, clinical, social) and information on exposures and potential confounders<br>(b) Indicate number of participants with missing data for each variable of interest<br>(c) Summarise follow-up time (eg, average and total amount)                                                                                                                | Page 12, (Table1)   |
| Outcome data             | 15* | Report numbers of outcome events or summary measures over time                                                                                                                                                                                                                                                                                                                                                | Page 13,14          |
| Main results             | 16  | (a) Give unadjusted estimates and, if applicable, confounder-adjusted estimates and their precision (eg, 95% confidence interval). Make clear which confounders were adjusted for and why they were included<br>(b) Report category boundaries when continuous variables were categorized<br>(c) If relevant, consider translating estimates of relative risk into absolute risk for a meaningful time period | Page 15<br>Tabel 1  |
| Other analyses           | 17  | Report other analyses done—eg analyses of subgroups and interactions, and sensitivity analyses                                                                                                                                                                                                                                                                                                                |                     |
| <b>Discussion</b>        |     |                                                                                                                                                                                                                                                                                                                                                                                                               |                     |
| Key results              | 18  | Summarise key results with reference to study objectives                                                                                                                                                                                                                                                                                                                                                      | Page 15,16          |
| <b>Limitations</b>       |     |                                                                                                                                                                                                                                                                                                                                                                                                               |                     |
| Interpretation           | 20  | Give a cautious overall interpretation of results considering objectives, limitations, multiplicity of analyses, results from similar studies, and other relevant evidence                                                                                                                                                                                                                                    | Page 16             |
| Generalisability         | 21  | Discuss the generalisability (external validity) of the study results                                                                                                                                                                                                                                                                                                                                         | Page 18             |
| <b>Other information</b> |     |                                                                                                                                                                                                                                                                                                                                                                                                               |                     |
| Funding                  | 22  | Give the source of funding and the role of the funders for the present study and, if applicable, for the original study on which the present article is based                                                                                                                                                                                                                                                 | Page 20             |

\*Give information separately for cases and controls in case-control studies and, if applicable, for exposed and unexposed groups in cohort and cross-sectional studies.

**Note:** An Explanation and Elaboration article discusses each checklist item and gives methodological background and published examples of transparent reporting. The STROBE checklist is best used in conjunction with this article (freely available on the Web sites of PLoS Medicine at <http://www.plosmedicine.org/>, Annals of Internal Medicine at <http://www.annals.org/>, and Epidemiology at <http://www.epidem.com/>). Information on the STROBE Initiative is available at [www.strobe-statement.org](http://www.strobe-statement.org).

# BMJ Open

## Progression of disease preceding lower extremity amputation in Denmark: A longitudinal registry study of diagnoses, use of medication and healthcare services 14 years prior to amputation

|                                 |                                                                                                                                                                                                                                                                                                                                                                                                                                                                                                                                                                                                              |
|---------------------------------|--------------------------------------------------------------------------------------------------------------------------------------------------------------------------------------------------------------------------------------------------------------------------------------------------------------------------------------------------------------------------------------------------------------------------------------------------------------------------------------------------------------------------------------------------------------------------------------------------------------|
| Journal:                        | <i>BMJ Open</i>                                                                                                                                                                                                                                                                                                                                                                                                                                                                                                                                                                                              |
| Manuscript ID                   | bmjopen-2017-016030.R1                                                                                                                                                                                                                                                                                                                                                                                                                                                                                                                                                                                       |
| Article Type:                   | Research                                                                                                                                                                                                                                                                                                                                                                                                                                                                                                                                                                                                     |
| Date Submitted by the Author:   | 09-Jun-2017                                                                                                                                                                                                                                                                                                                                                                                                                                                                                                                                                                                                  |
| Complete List of Authors:       | Jensen, Pia; Copenhagen University Hospital, Hvidovre, Optimed, Clinical Research centre<br>Petersen, Janne; Copenhagen University Hospital, Hvidovre, Clinical Research Centre (056); Department of Public Health Section of Biostatistics, University of Copenhagen, Denmark<br>Kirketerp-Møller, Klaus; University Hospital of Copenhagen, Bispebjerg, Copenhagen Wound Healing Centre<br>Poulsen, Ingrid; Traumatic Brain Injury Unit, Rigshospitalet, Copenhagen, Denmark , Clinic of Neurorehabilitation<br>Andersen, Ove; Copenhagen University Hospital, Hvidovre, Denmark, Clinical Research Centre |
| <b>Primary Subject Heading</b>: | Health services research                                                                                                                                                                                                                                                                                                                                                                                                                                                                                                                                                                                     |
| Secondary Subject Heading:      | Diabetes and endocrinology, Epidemiology, Cardiovascular medicine                                                                                                                                                                                                                                                                                                                                                                                                                                                                                                                                            |
| Keywords:                       | Lower Extremity amputation, Atherosclerosis, Diabetes, Health care service                                                                                                                                                                                                                                                                                                                                                                                                                                                                                                                                   |
|                                 |                                                                                                                                                                                                                                                                                                                                                                                                                                                                                                                                                                                                              |

SCHOLARONE™  
Manuscripts

1  
2  
3 1 **Title**

4  
5  
6 2 Progression of disease preceding lower extremity amputation in Denmark: A longitudinal  
7  
8 3 registry study of diagnoses, use of medication and healthcare services 14 years prior to  
9  
10 4 amputation

11  
12  
13 5 **Corresponding author**

14 6 Pia S e Jensen (1,2)

15  
16  
17 7 Research team: Optimed (Optimized Senior Patient Program)

18  
19 8 Postal address: Clinical Research Centre, Copenhagen University Hospital, Hvidovre,  
20  
21 9 Ketteg rd Alle 30, 2650 Hvidovre, Denmark.

22  
23 10 Telephone +45 38 62 24 64,

24  
25 11 E-mail: [Ann.Pia.Soe.Lytken.Jensen@regionh.dk](mailto:Ann.Pia.Soe.Lytken.Jensen@regionh.dk)

26  
27  
28  
29 13 **CoAuthors:**

30  
31 14 Janne Petersen (1,3), e-mail [Janne.Petersen.01@regionh.dk](mailto:Janne.Petersen.01@regionh.dk)

32  
33 15 Klaus Kirketerp-M ller (4), e-mail [klaus.kirketerp-moeller.01@regionh.dk](mailto:klaus.kirketerp-moeller.01@regionh.dk)

34  
35 16 Ingrid Poulsen (5), e-mail [Ingrid.Poulsen@regionh.dk](mailto:Ingrid.Poulsen@regionh.dk)

36  
37 17 Ove Andersen (1), e-mail [Ove.Andersen@regionh.dk](mailto:Ove.Andersen@regionh.dk)

38  
39  
40  
41 19 **Affiliations:**

42 20 (1) Clinical Research Centre Copenhagen University Hospital, Hvidovre, Denmark

43 21 (2) Department of Orthopaedic Surgery, Copenhagen University Hospital, Hvidovre,  
44  
45 Denmark

46  
47 23 (3) Department of Public Health Section of Biostatistics, University of Copenhagen,  
48  
49 Denmark

50 25 (4) Copenhagen Wound Healing Centre, University Hospital of Copenhagen, Bispebjerg,  
51  
52 Denmark

53 27 (5) Clinic of Neurorehabilitation, Traumatic Brain Injury Unit, Rigshospitalet,  
54  
55 Copenhagen, Denmark

56  
57 29 **Word count:** 3980

1  
2  
3 30 **Abstract**  
4  
5

6 31 **Objectives:** Patients with non-traumatic lower extremity amputation are characterised by  
7  
8 32 high age, multi-morbidity and polypharmacy and long-term complications of atherosclerosis  
9  
10 33 and diabetes. To ensure early identification of patients at risk of amputation, we need to gain  
11  
12 34 knowledge about the progression of diseases related to lower extremity amputations during  
13  
14 35 the years preceding the amputation.  
15

16  
17 36 **Design:** A retrospective population-based national registry study.  
18

19  
20 37 **Setting:** The study includes data on demographics, diagnoses, surgery, medications, and  
21  
22 38 healthcare services from five national registries. Data were retrieved from 14 years before  
23  
24 39 until 1 year after the amputation. Descriptive statistics were used to describe the progression  
25  
26 40 of diseases and use of medication and healthcare services.  
27

28  
29 41 **Participants:** An unselected cohort of patients ( $\geq 50$  yrs;  $n=2883$ ) subjected to a primary  
30  
31 42 non-traumatic lower extremity amputation in 2010 or 2011 in Denmark.  
32

33 43 **Results:** The prevalence of atherosclerosis, hypertension and diabetes was 70%, 53% and  
34  
35 44 49%, respectively. Among of patients with atherosclerosis, 42 % had not received  
36  
37 45 cholesterol-lowering treatment even though 87% had visited their general practitioner within  
38  
39 46 the last year prior to amputation. Further, 16% were diagnosed with diabetes at the time of  
40  
41 47 the amputation. The prevalence of cardiovascular diseases increased from 22% to 70%,  
42  
43 48 atherosclerosis from 5% to 53%, and diabetes from 17% to 35% over the 14 years preceding  
44  
45 49 major amputation. Of all patients, 64% had been in contact with the hospital or out-patient  
46  
47 50 clinics within the last three years and 29% received a prescription of opioids three years prior  
48  
49 51 to the amputation.  
50

51  
52 52 **Conclusion:** Among patients with non-traumatic lower extremity amputation, one-third live  
53  
54 53 with undiagnosed and untreated atherosclerosis and one-sixth suffer from undiagnosed  
55  
56 54 diabetes despite continuous contacts to general practitioner and the hospital. This study  
57  
58  
59  
60

1  
2  
3 55 emphasises a need for enhanced focus, among both hospital clinicians and general  
4  
5 56 practitioners, on the early identification of atherosclerosis and diabetes.  
6  
7

8 57 **Keywords** Lower extremity amputation, Atherosclerosis, Diabetes, Healthcare services  
9

10  
11 58 **Strengths and limitations of the study**  
12  
13

- 14  
15 59 • The strengths of this national registry study were the inclusion of data describing  
16  
17 60 diagnoses and use of medication and healthcare services during the last 14 years  
18  
19 61 preceding non-traumatic LEA performed in Denmark.  
20  
21  
22 62 • The main limitation was the lack of a control group. An age-, sex-, and geographically-  
23  
24 63 matched control group would have allowed differentiation between disease progression  
25  
26 64 due to aging and disease progression leading to amputation. An inherent limitation was  
27  
28 65 that the data did not allow an estimation of patient compliance with the prescribed  
29  
30 66 medication.  
31  
32

33 67 **Abbreviations**  
34  
35

36 68 LEA: lower extremities amputation  
37

38 69 Major LEA: Lower extremity amputation performed above the ankle level  
39

40 70 Minor LEA: Lower extremity amputation performed below the ankle level  
41

42 71 AKA: Above knee amputation  
43

44 72 BKA: Below knee amputation  
45

46 73 PAD: Peripheral artery disease  
47

48 74 GP: General practitioner  
49  
50  
51  
52  
53  
54  
55  
56  
57  
58  
59  
60

## 75 Introduction

76 Lower extremity amputation (LEA) is a severe event associated with loss of mobility, pain,  
77 decreased quality of life, major disfigurement, and increased risk of re-amputation and  
78 hospitalisation (1–3). Even though the worldwide incidence of LEA has declined over the last  
79 two decades, significant variations persist; from 5.8 to 31 per 10<sup>5</sup> individuals in different  
80 populations (4). The reported one-year mortality rate was 12% to 58% (5–8), with the highest  
81 mortality rate (45%–58%) associated with above-the-knee amputations (AKA) (9,10). Age  
82 and the severity of comorbidities are the most prominent prognostic factors for mortality after  
83 LEA (6,7).

84 The most prevalent comorbidities in patients with LEA are atherosclerosis primary as  
85 periphery vascular disease (PAD) and diabetes (4,11–13). Studies have reported the  
86 prevalence's of diabetes to be between 52%–64% (3,5,14) and approximately 80% of the  
87 patients with LEA are either diagnosed with diabetes or PAD (12). In a cohort of patients with  
88 diabetes, 18% had a cardiovascular disease with PAD being most prevalent (15). Among  
89 patients diagnosed with both diabetes and PAD, the risk of amputation is 1.5 times higher  
90 than in patients diagnosed with PAD alone and five times higher than in patients only  
91 diagnosed with diabetes (13). The global prevalence of diabetes and PAD among patients  
92 with LEA varies among populations due to ethnicity and socioeconomic e.g. (4,16).

93 Currently, the global prevalence of diabetes is estimated to 9% of which 90% is  
94 characterised as type 2 diabetes (17) and is expected to continue to increase over the next  
95 twenty years to 10%. During the last decade, the global prevalence of PAD has increased by  
96 23%, with the highest increase among low-income countries (18). The risk factors for PAD  
97 are age, smoking, diabetes, hypertension, dyslipidaemia, and obesity (19). The NICE  
98 guidelines for lower limb peripheral arterial disease state that there is substantial evidence  
99 establishing benefits for lowering cholesterol drugs for patients with PAD and the use of  
100 limb-saving procedure are also recommended (20). The benefits of cholesterol lowering  
101 drugs have shown a significant reduction in the risk of major amputation (21,22).

1  
2  
3 102 To our knowledge, only a few studies have previously investigated the progression of  
4  
5 103 diseases and use of health-care services before amputation using historical longitudinal  
6  
7 104 data. One case-control study including data collected seven years before amputation and  
8  
9 105 recommended early referral to a medical specialist to prevent LEA among patients with  
10  
11 106 diabetes (23), all though a population-based study found that repeated visit to the hospital  
12  
13 107 did not lower the risk of amputation among patients with diabetes/PAD (24). Other studies  
14  
15 108 have also shown delayed referral to revascularization to prevent loss of extremity and  
16  
17 109 inadequate treatment of cholesterol-lowering drug (25,26)  
18  
19  
20 110 Nevertheless, the risk of amputation remains high, and some patients remain undiagnosed  
21  
22 111 until it is too late to prevent LEA (27). The first step to improving the early identification is to  
23  
24 112 acquire more knowledge of the characteristics of patients, variation and progression of  
25  
26 113 diseases and use of health care services prior to amputations. The aim of this study was to  
27  
28 114 explore the progression of LEA-related diseases. We examined the use of medication and  
29  
30 115 the number of contacts with health care services during the 14 years leading up to LEA,  
31  
32 116 among all Danish patients that underwent LEAs in 2010 or 2011. Finally, we studied the  
33  
34 117 associations between LEA-related diseases and the one-year prognosis after the LEA  
35

36  
37 118  
38  
39  
40  
41  
42  
43  
44  
45  
46  
47  
48  
49  
50  
51  
52  
53  
54  
55  
56  
57  
58  
59  
60

1  
2  
3 119 **Methods**  
4

5  
6 120 **Setting**  
7

8 121 The Danish healthcare system is tax-funded and offers free and equal access to medical  
9  
10 122 care. All citizens have a general practitioner (GP) who provides referrals to specialists and  
11  
12 123 hospital treatments. The GPs are responsible for their patients' medical treatment.  
13  
14 124 Prescribed medications and other healthcare services, such as a physiotherapy, etc., are  
15  
16 125 partly tax-funded, with a differential out-of-pocket fee.  
17

18  
19 126 **Study design and data sources**  
20

21  
22 127 We included data from the following five national registries: (1) The National Patient Registry  
23  
24 128 (NPR), which contains information on hospitalisations, including visits to outpatient clinics  
25  
26 129 and emergency rooms (28), surgical procedures, coded according to the Nordic  
27  
28 130 Classification of Surgical Procedures (NCSP), and diagnoses coded according to the  
29  
30 131 International Classification of Diseases (ICD-10); (2) The National Prescription Registry,  
31  
32 132 which contains information on prescribed medications picked up at the pharmacy (29), the  
33  
34 133 data are coded according to the global Anatomical Therapeutic Chemical (ATC)  
35  
36 134 classification system; (3) The Danish National Health Service Registry for Primary Care  
37  
38 135 (NHSR), which contains information on all contacts with GPs, including out-of-hours care  
39  
40 136 from GPs and practising medical specialists (30); (4) The Danish Civil Registration System  
41  
42 137 (CRS), which contains information on gender, date of birth, vital status, spouses and  
43  
44 138 residents (31); and (5) The Attainment Registry, which contains data on education level. All  
45  
46 139 Danish citizens are registered with a unique personal identification number (CPR number),  
47  
48 140 which allows linkage with all national registries at an individual level. Statistics Denmark  
49  
50 141 provided the data (<http://www.danmarksstatistik.dk/en>).  
51  
52  
53  
54  
55  
56  
57  
58  
59  
60



1  
2  
3 142 **Study cohort**  
4

5 143 We included patients with at least one of the following surgical procedures, performed  
6  
7 144 between the 1st of January 2010 and 31st of December 2011: Hip-exarticulation or trans-  
8  
9 145 femoral amputation (i.e., Above-knee amputation [AKA]); knee disarticulation or trans-tibial  
10  
11 146 amputation (i.e., Below-the-knee amputation [BKA]); foot amputation; or toe amputation. See  
12  
13 147 supplementary materials for detailed information. To eliminate trauma-related amputations,  
14  
15 148 we excluded patients with a trauma diagnosis recorded at any time prior to the amputation.  
16  
17 149 We also excluded foreign patients without a CPR number or below 18 years of age. To  
18  
19 150 ensure homogeneity within the groups, we defined an index amputation as the first surgical  
20  
21 151 amputation performed as an AKA, BKA, foot- or toe amputation in 2010 and 2011.  
22  
23

24 152 **Categorisation of amputation procedures**  
25

26  
27 153 For patients who received more than one amputation procedure on the same day, the most  
28  
29 154 severe (proximal) procedure was identified for analysis. The severity of different types of  
30  
31 155 amputations (based on surgical codes) was ranked from the most severe procedure as hip-  
32  
33 156 exarticulation and transfemoral amputation to the least severe as a toe amputation  
34  
35 157 procedure. A detailed description is present in the supplementary material. When patients  
36  
37 158 had both a left- and right-side amputation code on the same day, the procedure was  
38  
39 159 categorised as a bilateral amputation. AKA and BKA were classified as major amputations,  
40  
41 160 and foot or toe amputations were classified as minor amputations.  
42  
43

44 161 **Demographics, comorbidities, medications, and contacts with healthcare services**  
45

46 162 For each patient, we retrieved cumulative registry information on the education level, living  
47  
48 163 conditions, socioeconomic status, place of residence, diagnoses, prescribed medications,  
49  
50 164 contacts with healthcare services, re-amputations, and death, which had been recorded  
51  
52 165 between 01.01.1997 and 31.12.2012. The Elixhauser Comorbidity Index was used to identify  
53  
54 166 the progression of comorbidities over the 14 years prior to amputation. The Index includes  
55  
56 167 31 pre-defined comorbidities; however, in this study, we combined the pre-defined codes for  
57  
58  
59  
60

1  
2  
3 168 uncomplicated and complicated diabetes and hypertension (32). The Elixhauser Comorbidity  
4  
5 169 Index was supplemented with ICD-10 codes for atherosclerosis, including atherosclerosis in  
6  
7 170 the lower extremities, diabetic neuropathy, retinopathy, nephropathy foot ulcer, other ulcers  
8  
9 171 (not related to diabetes), stroke, emboli, bone cancer, and arthrosis, see supplementary  
10  
11 172 material. The severity of the comorbidity identified at the time of the index amputation was  
12  
13 173 evaluated with the Charlson Comorbidity Index (33). We divided the patients into three  
14  
15 174 groups, according to the Charlson Comorbidity Index: 0-1, 2, and 3+, where a higher score  
16  
17 175 predicted an increased risk of mortality. The prescribed medications were defined as  
18  
19 176 medications that were picked up from the pharmacy at least once each year. The prescribed  
20  
21 177 medications were grouped according to ACT codes. The coding and the classifications of  
22  
23 178 drugs were defined by the authors and validated by consensus agreement among three  
24  
25 179 pharmacists who did not participate in the study, see supplementary material.  
26  
27

28 180 The NPR registry contains only information on diagnoses recorded during hospitalisation,  
29  
30 181 and not by GPs. Therefore, central diseases were defined by combining the prevalence of  
31  
32 182 the medication (ACT- codes) collected from the pharmacy with the registered diagnosis  
33  
34 183 (ICD-10 codes) from hospitals: diabetes<sup>comb</sup>, atherosclerosis<sup>comb</sup>, cardiovascular diseases<sup>comb</sup>  
35  
36 184 and hypertension<sup>comb</sup> (see supplementary material). A visit to a GP was defined as a show-  
37  
38 185 up at the GP clinic, visits to outpatient clinics included only clinics at the hospitals while a  
39  
40 186 visit to a medical specialist only includes private clinics.  
41  
42

#### 43 44 187 **Ethical approval**

45  
46 188 This register-based study included only anonymous data from national registries and had no  
47  
48 189 patient contact. The scientific board of Statistics Denmark and "Statens Serum Institut"  
49  
50 190 approved the study (project no 704122).  
51

#### 52 53 191 **Statistics**

54  
55 192 Descriptive data, comorbidities, and the use of medication for each of the amputation groups  
56  
57 193 were expressed as frequencies with percentages, for categorical data, or as median and  
58  
59  
60

1  
2  
3 194 intraquartile range (IQR = 25th to 75th percentile) for continuous data. A comparison  
4  
5 195 between major and minor amputations was made with a  $\chi^2$  test, for categorical data, and a  
6  
7 196 Kruskal-Wallis test for continuous data. Diagnoses and relevant medications were compared  
8  
9 197 between amputation types and atherosclerosis, diabetes, hypertension and between  
10  
11 198 cardiovascular disease (CVD), diabetes and patients without. The prevalence of diagnoses  
12  
13 199 and use of medications over time are depicted as graphs of the proportions of patients with a  
14  
15 200 given disease, and the proportion that used a given medication, respectively. The difference  
16  
17 201 in prevalence over time is expressed as percent point (pp). The data analysis was performed  
18  
19 202 with SAS 9.4, and the cumulative incidence plots were constructed with R 3.2.2. Graphs of  
20  
21 203 the progression over time were created with GraphPad Prism 6.07, and the flowchart was  
22  
23 204 created in PowerPoint 2010. P-values less than 5% were considered significant.

25  
26 205  
27 206  
28  
29  
30  
31  
32  
33  
34  
35  
36  
37  
38  
39  
40  
41  
42  
43  
44  
45  
46  
47  
48  
49  
50  
51  
52  
53  
54  
55  
56  
57  
58  
59  
60

1  
2  
3 207 **Results**  
4

5  
6 208 A total of 3375 patients underwent an LEA in Denmark during 2010 and 2011. Of these, 4%  
7  
8 209 required LEAs due to trauma, and were excluded from the cohort (Figure 1). Additionally,  
9  
10 210 352 patients (11%) were excluded, due to a previous amputation on the same or opposite  
11  
12 211 leg, at the same or a higher level, leaving 2883 patients who fulfilled the criteria for  
13  
14 212 undergoing an index amputation during 2010 and 2011. Major amputations were performed  
15  
16 213 in 1782 patients (62%), and minor amputations were performed in 1101 patients (38%).  
17  
18 214 Patient characteristics are presented in Table 1. Among patients with major amputations,  
19  
20 215 1562 (88%) had not received previous amputations. Among the 266 patients with previous  
21  
22 216 amputations (on a lower level), 101 patients (38%) were bilaterally amputated.  
23  
24

25 217 ***Comorbidities and medical treatment in the year of amputation***  
26

27  
28 218 Patient diagnoses and current medications that were recorded at the time of the index  
29  
30 219 amputation are presented in Table 2 and 3. Both diabetes and atherosclerosis were  
31  
32 220 diagnosed in 32% of patients (577/1782) with major amputations and 35% of patients  
33  
34 221 (382/1101) with minor amputations. A subgroup analysis of characteristics, comorbidities  
35  
36 222 and medical treatment among patients diagnosed with either CVD including arteriosclerosis,  
37  
38 223 diabetes or neither are presented in Table 4. A total of 2350 (82%) patients were diagnosed  
39  
40 224 with CVD of which 1185 had CVD without diabetes and 1451 patients were diagnosed with  
41  
42 225 diabetes of which 286 were not diagnosed with CVD. Furthermore, among patients  
43  
44 226 diagnosed with atherosclerosis, 42% (851/2017) had not received cholesterol-lowering drugs  
45  
46 227 at the time of amputation. The absence of cholesterol-lowering treatment was observed  
47  
48 228 significantly more among patients with major amputations than among those with minor  
49  
50 229 amputations, (46% (650/1428) vs 34% (201/589);  $p < 0.001$ ). Among patients diagnosed with  
51  
52 230 cardiovascular diseases (CVD) and patients diagnosed with diabetes, had 46% (543/1185)  
53  
54 231 and 65% (940/1451) received cholesterol-lowering before the amputation, see Table 4.  
55  
56 232 Among patients diagnosed with diabetes, 225 patients (16%) did not at any time receive  
57  
58  
59  
60

1  
2  
3 233 insulin or blood glucose-lowering drugs preceding the amputation. The absence of  
4  
5 234 antidiabetic treatment prior to the amputation was observed significantly more often among  
6  
7 235 patients with major amputations than among patients with minor amputations (19%  
8  
9 236 (134/697) vs 13% (91/710),  $p < .001$ ).

10  
11 237 ***Disease progression and medications during the 14 years prior to amputation***

12  
13  
14 238 Figure 2 shows the gradual increases in the proportion of patients with the most common  
15  
16 239 diagnoses (atherosclerosis, diabetes, and hypertension) recorded during hospitalisations  
17  
18 240 and the medications used (including antithrombotic agents, cholesterol-lowering treatments,  
19  
20 241 antidiabetic drugs, and antihypertensive therapies) during the 14 years prior to the  
21  
22 242 amputation. Among patients undergoing major amputations, the prevalence of  
23  
24 243 atherosclerosis increased from 2% to 20% over the first 13 years, and a 58 pp increase was  
25  
26 244 observed during the last year preceding the amputation. During the 14 years, the use of  
27  
28 245 cholesterol-lowering drugs increased from 3% to 50%. There was a 28 pp difference  
29  
30 246 between patients diagnosed with atherosclerosis who received cholesterol-lowering  
31  
32 247 treatment or not prior to the amputation. Furthermore, the use of antithrombotic drugs  
33  
34 248 increased from 15% to 65% during the first 13 years, and the use further increased by 6  
35  
36 249 percent point in the last year (Figure 2a). Among patients with minor amputations, the  
37  
38 250 prevalence of diabetes increased from 8% to 40%, and antidiabetic treatments increased  
39  
40 251 from 29% to 55%. During the last year, the prevalence of diabetes increased by 21 percent  
41  
42 252 point, and the gap between treatment and diagnosis was only 3 percent point prior to minor  
43  
44 253 amputation (Figure 2b). Antihypertensive treatments increased from 23% to 60% during the  
45  
46 254 first 13 years, and then dropped slightly, by 4 percent point, in the last year prior to a major  
47  
48 255 amputation. Similarly, antihypertensive treatments increased from 20% to 64% over the 14  
49  
50 256 years prior to minor amputations (Figure 2c).

51  
52  
53  
54 257 The estimated disease progressions, calculated as the combination of the diagnosis  
55  
56 258 prevalence and the medication prevalence, are presented in Figure 3. The progression of  
57  
58  
59  
60

1  
2  
3 259 diseases prior to a major amputation increased as follows: atherosclerosis<sup>comb</sup> increased  
4  
5 260 from 5% to 53% during the 14 years, with a 16 percent point increase in the last five years  
6  
7 261 preceding amputation; hypertension<sup>comb</sup> increased from 23% to 63%; cardiovascular  
8  
9 262 diseases<sup>comb</sup> increased from 22% to 70%; and diabetes<sup>comb</sup> increased from 17% to 35%. The  
10  
11 263 use of opioids increased from 10% to 45%, with an 18 percent point increase the last five  
12  
13 264 years prior to amputation. Further, 32% received prescribed opioids three years prior to  
14  
15 265 major amputation (Figure 3a). Among patients with minor amputations, the prevalence of  
16  
17 266 atherosclerosis<sup>comb</sup> increased from 3% to 51% during the 14 years; cardiovascular  
18  
19 267 diseases<sup>comb</sup> increased from 16% to 63%; hypertension<sup>comb</sup> increased from 20% to 66%; and  
20  
21 268 diabetes increased from 29% to 57%. The use of opioids increased from 9% to 34%, with a  
22  
23 269 12 percent point increase in the last five years (Figure 3b). In total, 29 % received opioids  
24  
25 270 three years before the amputation.

#### 271 ***Contacts made to hospitals and GPs during the 14 years prior to amputation***

272 Patients' visits to the healthcare system (hospitals, outpatient clinics, and GPs) during the 14  
273 years prior to amputation are presented in Figure 3. 98% of the patients contacted  
274 healthcare services at least once during the last year prior to amputation. The proportion of  
275 patients contacting their GPs increased from 85% to 97% and the mean number of visits to  
276 GPs per year increased from 4.5 to 7.7 visits. The proportion of patients attending outpatient  
277 clinics increased from 25% to 76%, and the mean visits to outpatient clinics per year  
278 increased from 0.4 to 3.2 visits. During the last year prior to amputation, 2% of the patients  
279 had no contact with GPs or hospitals, 1% had only contacted hospitals, and 18% had only  
280 contacted GPs.

281 Among 851 patients diagnosed with arteriosclerosis without receiving cholesterol-lowering  
282 drugs at any time prior to the amputation, 87% had visited their GP, 29% had called out-of-  
283 hours care, 47% had been hospitalised, 70% had visited outpatient clinics, and 29% had  
284 visited the emergency room during the last year prior to amputation.

### 285 ***Cumulative incidences of death and re-amputation***

286 Figure 4 shows the cumulative incidences of death and re-amputation for first year after  
287 LEA. The hazard ratios for death the first year after an AKA (compared to foot amputation)  
288 were 4.41 (95%CI: 3.44-5.66,  $p<0.001$ ) with no adjustments, 3.39 (95%CI: 2.64-4.37,  
289  $p<0.001$ ) after adjusting for demographics (gender, age, social status and living  
290 arrangement), and 4.0 (95%CI: 3.09-5.19,  $p<0.001$ ) after also adjusting for co-morbidities  
291 (diabetes, arteriosclerosis, hypertension, and use of opioids). The hazard ratios for death the  
292 first year after a BKA (compared to foot amputation) were 2.57 (95%CI: 1.97-3.19,  $p<0.001$ )  
293 without adjustments, 2.28 (95%CI: 1.75-2.97,  $p<0.001$ ) after adjusting for demographics,  
294 and 2.39 (95%CI: 1.83-3.13,  $p<0.001$ ) after also adjusting for co-morbidity.

295 The hazard ratios for re-amputation the first year after an AKA were 4.16 (95%CI: 3.24-5.34,  
296  $p<0.001$ ) without adjustments, 3.20 (95%CI: 2.49-4.13,  $p<0.001$ ) after adjusting for  
297 demographics, and 3.69 (95%CI: 2.85-4.79,  $p<0.001$ ) after also adjusting for co-morbidity.

298 The hazard ratios for death the first year after a BKA were 2.64 (95%CI: 2.02-3.43,  $p<0.001$ )  
299 without adjustments, 2.34 (95%CI: 1.79-3.05,  $p<0.001$ ) after adjusting for demographics,  
300 and 2.4 (95%CI: 1.83-3.14,  $p<0.001$ ) after also adjusting for co-morbidity.

### 301 **Discussion**

302 This study showed that the prevalence of atherosclerosis was 70% and the prevalence of  
303 diabetes was 49% in an unselected national cohort of patients undergoing LEAs. Among  
304 patients with atherosclerosis, 42% had not received cholesterol-lowering treatments,  
305 although 87% of these patients had visited their GP within the preceding the amputation.  
306 Additionally, 16% of the patients with diabetes were diagnosed with diabetes the year of the  
307 amputation. The majority of patients (85% - 97%) had a contact to their GP within the 14  
308 years prior to amputation, and 64% were in contact with a hospital outpatient clinic within the  
309 three years prior to amputation. Moreover, 88% of patients undergoing major extremity  
310 amputation had no previous amputation on a lower level. Additionally, only 6% of patients in



1  
2  
3 311 this cohort had undergone revascularisation prior to amputation. Nevertheless, one out of  
4  
5 312 three patients received prescribed opioids three years prior to amputation. Traditionally, LEA  
6  
7 313 has been associated with long-term complications of diabetes. However, the prevalence of  
8  
9 314 cardiovascular diseases are increasing in western countries; consequently, the traditional  
10  
11 315 perceptions must be redefined to identify risk factors for LEA. In our national cohort of  
12  
13 316 patients with major amputations, the majority (83%) was diagnosed with atherosclerosis, and  
14  
15 317 less (33%) had diabetes. In comparison, patients with minor amputations had a higher  
16  
17 318 prevalence of diabetes (64%) and lower prevalence of atherosclerosis (53%). Similar  
18  
19 319 distributions were identified by The Global Lower Extremity Amputation Study Group, 2000  
20  
21 320 (16).

22  
23  
24 321 According to the guidelines, our results indicate a suboptimal treatment of atherosclerosis  
25  
26 322 and identification of diabetes. There was a 28 percent point difference between the  
27  
28 323 proportion of patients who received cholesterol-lowering drugs and the proportion of patients  
29  
30 324 diagnosed with atherosclerosis. Also, among patients with diabetes, there was a six percent  
31  
32 325 point gap between patients having diabetes and patients receiving anti-diabetic treatment,  
33  
34 326 indicating an unsolved clinical problem in identifying atherosclerosis and diabetes. Indeed,  
35  
36 327 timely treatment might have saved these patients from an extremity amputation. The lack of  
37  
38 328 recognition of symptoms related to PAD among both patients and health care professionals  
39  
40 329 may be linked to a lack of knowledge inhibiting patients to react on symptoms and consult  
41  
42 330 their GP in time (34). Additionally, only 6% of the patients had received revascularisations  
43  
44 331 (angioplasty or bypass) prior to the index amputation. These results were concerning as  
45  
46 332 revascularisation surgery still is an essential part of the treatment for critical ischaemia in  
47  
48 333 lower extremities (35,36). Similarly, Moxey et al. also found a low prevalence of  
49  
50 334 revascularisation of 9% in an unselected, nationwide cohort (37). However, Ahmad et al.  
51  
52 335 found a 30% prevalence of revascularisation in an unselected population cohort in England  
53  
54 336 (11). Ahmad et al. also demonstrated demographic variations in the prevalence of  
55  
56  
57  
58  
59  
60



1  
2  
3 337 amputations and revascularisations, which were associated with social inequalities and the  
4  
5 338 presence of chronic diseases.  
6  
7  
8 339 The results of this study point towards several possibilities for preventing LEA. The finding  
9  
10 340 that 29% of the patients received intensive pain treatment already three years prior to major  
11  
12 341 amputation indicate symptoms of critical extremity ischaemia. For comparison, 2.6 % of the  
13  
14 342 Danish population collected prescribed opioids in 2011 (38). Thus, it is essential that distal  
15  
16 343 lower extremity pain should be recognised as a symptom of PAD to ensure that patients are  
17  
18 344 referred to specialists to confirm the diagnosis (39,40). In Denmark, ankle and toe blood  
19  
20 345 pressure are measured to calculate the Ankle-Brachial Index (ABI) (41), a non-invasive  
21  
22 346 diagnostic test for PAD (42). This procedure is mainly performed at the hospitals, and rarely  
23  
24 347 by the GP. Throughout the 14 years preceding amputation, the majority of patients in this  
25  
26 348 study had regular and increasing contact with their GPs (prevalence increase from 85% to  
27  
28 349 97%). Thus, early identification might be feasible because patients do seek medical advice in  
29  
30 350 the years prior to amputation. Furthermore, the proportion of patients in contact with  
31  
32 351 outpatient clinics or were admitted to hospital increased from 25% and 76% and from from  
33  
34 352 32% to 49% during the 14 years preceding the amputation. Buckley et al. followed patients  
35  
36 353 with diabetes for seven years prior to LEA and concluded a need for early referral to  
37  
38 354 specialists to reduce the risk of LEA (23). It has been suggested that PAD screening could  
39  
40 355 be performed with non-invasive methods like the ABI (43). Other studies have indicated that  
41  
42 356 routine screening could promote preventive treatment and that a screening strategy could  
43  
44 357 cost-effectively prevent the progression of PAD and cardiovascular events (44,45).  
45  
46  
47 358 Alternatively, Brand (46) and Boulton et al. (47) have suggested that a simple clinical  
48  
49 359 examination of a patient's feet could indicate a need to confirm PAD. Thus, treatment could  
50  
51 360 be initiated (including specialist referrals) to prevent ulcers due to ischaemia, and thus,  
52  
53 361 prevent LEA. This study supports the conclusion made by Jones et al. that calls for  
54  
55  
56  
57  
58  
59  
60

1  
2  
3 362 education programs to focus on prevention and early identification to ensure adequate  
4  
5 363 treatment for preventing LEA (5).  
6

7  
8 364 In this study, the majority of patients (92%) had no history of previous amputation preceding  
9  
10 365 the index major amputation. Heyer et al. reported that 92 % of their patients had no previous  
11  
12 366 amputation based on data from health insurance companies (12) and Buckley et al. found  
13  
14 367 that 28% of a selected cohort of patients with diabetes had a history of amputations (23).  
15

16 368 The present study confirms that the risk of death is highest among patients with major  
17  
18 369 amputation. In contrast, neither demographics nor comorbidities could explain the high risk  
19  
20 370 of death. Thus, other factors must affect the outcome after LEA, such as the general health  
21  
22 371 status and the nutritional status of a patient. Also, factors related to the perioperative  
23  
24 372 treatment, like a delay to surgery, could have a negative impact on the outcome (48). Similar  
25  
26 373 results were reported by Jones et al., Hoffstad et al., and Wiessman et al., who called for  
27  
28 374 more comprehensive, multidisciplinary efforts (5,7,10).  
29

30  
31 375 The strength of this study was the use of a national cohort based on the national registry,  
32  
33 376 which contained information recorded over a period of 14 years before the amputation.  
34  
35 377 Furthermore, we could crosslink data in various registries at an individual level, which made  
36  
37 378 it possible to follow patients over time. The main limitation was the lack of a control group.  
38  
39 379 An age-, sex-, and geographically-matched control group could allow differentiation between  
40  
41 380 disease progression due to ageing and disease progression that leads to amputation. An  
42  
43 381 inherent limitation was that the data did not allow for an estimation of patient compliance with  
44  
45 382 the prescribed medication. Further, it was not possible to access neither the diagnosis  
46  
47 383 recorded by the GP, as these data are not included in the national registry, nor the indication  
48  
49 384 for the prescribed medication as this has just recently been included in the registry. Finally,  
50  
51 385 data on examinations such as ABI prior to the amputation would have provided a more  
52  
53 386 comprehensive overview of the limb-saving procedure.  
54  
55  
56  
57  
58  
59  
60

1  
2  
3 387 **Conclusion**  
4

5 388 In this study, one third of patients with LEA were living with undiagnosed or untreated  
6  
7 389 atherosclerosis and one out of six were living with undiagnosed diabetes despite a regular  
8  
9 390 contact with their GPs and outpatient clinics for several years prior to the amputation. For the  
10  
11 391 majority of patients undergoing major LEAs, the amputation was a first-time amputation.  
12  
13 392 Additionally, only a small number of patients underwent extremity-saving procedures,  
14  
15 393 although one in three had received opioid prescriptions several years before the amputation.  
16  
17 394 The overall findings of this study suggest that the need for opioids, combined with the  
18  
19 395 presence of hypertension, diabetes, or another cardiovascular disease, could be an  
20  
21 396 indication of PAD which is highly associated with lower extremity amputation. Further,  
22  
23 397 clinicians are encouraged to initiate medical treatment supplemented with a careful  
24  
25 398 inspection of the patient's feet as this non-invasive examination may detect an early  
26  
27 399 indication of low circulation.  
28  
29

30 400

31 401  
32  
33  
34  
35  
36  
37  
38  
39  
40  
41  
42  
43  
44  
45  
46  
47  
48  
49  
50  
51  
52  
53  
54  
55  
56  
57  
58  
59  
60

1  
2  
3 402 **Acknowledgements**

4  
5 403 We acknowledge the contribution from Research Services, Statistics Denmark and thank  
6  
7 404 Jørn K Petersen for his assistance. We especially thank Nasrin Faqir, for her contribution to  
8  
9 405 data management and analysis.

10  
11 406 **Competing interest**

12  
13 407 We have read and understood BMJ policy on declaration of interests and declare that we  
14  
15 408 have no competing interests

16  
17  
18 409 **Funding**

19  
20 410 This study was funded by The Novo Nordic Foundation grant number NNF12OC0002017,  
21  
22 411 and Copenhagen University Hospital, Hvidovre Research Foundation. None of the sponsors  
23  
24 412 were involved in the design of the study, collection, analysis, interpretation of data and in  
25  
26 413 writing the manuscript.

27  
28  
29 414 **Consent for publication**

30  
31 415 Not applicable

32  
33 416 **Data sharing statement**

34  
35 417 The datasets supporting the conclusions of this article are available in the Statistics  
36  
37 418 Denmark, <http://www.dst.dk/>. Statistics Denmark managed and provided the secured access  
38  
39 419 In according to Danish regulations, data are available by applying Statistics Denmark.

40  
41  
42 420 **Author contributors**

43  
44 421 SJ and JP describe the study. PSJ and OA ensured funding. PSJ, JP, KKM, IP and OA  
45  
46 422 designed the study. PSJ and JP applied for data at Statistics Denmark. PSJ and JP provided  
47  
48 423 the statistical expertise. IP, KKM and OA provided the clinical and medical expertise. PSJ  
49  
50 424 and JP performed the data management and analysis. All authors helped interpret the data.  
51  
52 425 The accuracy of data and analysis was reviewed by all authors who can take responsibility  
53  
54 426 for the integrity of the data and the accuracy of the data analysis. PSJ drafted the  
55  
56  
57  
58  
59  
60

1  
2  
3  
4  
5  
6  
7  
8  
9  
10  
11  
12  
13  
14  
15  
16  
17  
18  
19  
20  
21  
22  
23  
24  
25  
26  
27  
28  
29  
30  
31  
32  
33  
34  
35  
36  
37  
38  
39  
40  
41  
42  
43  
44  
45  
46  
47  
48  
49  
50  
51  
52  
53  
54  
55  
56  
57  
58  
59  
60

427 manuscript. All authors reviewed and critically revised the manuscript for intellectual content  
428 and approved the final version of the manuscript.

429

For peer review only

430 **References**

- 431 1. Suckow BD, Goodney PP, Nolan BW, Veeraswamy RK, Gallagher P, Cronenwett JL, et  
432 al. Domains that Determine Quality of Life in Vascular Amputees. *Ann Vasc Surg.*  
433 2015 May;29(4):722–30.
- 434 2. Ries Z. Incidence, Risk Factors, and Causes for Thirty-Day Unplanned Readmissions  
435 Following Primary Lower-Extremity Amputation in Patients with Diabetes. *JBJS J*  
436 *Bone Jt Surg.* 2015;97(21):1774–80.
- 437 3. Curran T, Zhang JQ, Lo RC, Fokkema M, McCallum JC, Buck DB, et al. Risk factors  
438 and indications for readmission after lower extremity amputation in the American  
439 College of Surgeons National Surgical Quality Improvement Program. *J Vasc Surg.*  
440 2014 Nov;60(5):1315–24.
- 441 4. Moxey PW, Gogalniceanu P, Hinchliffe RJ, Loftus IM, Jones KJ, Thompson MM, et al.  
442 Lower extremity amputations—a review of global variability in incidence. *DiabetMed*  
443 [Internet]. 2011 Mar 9;(1464–5491 (Electronic)). Available from: PM:21388445
- 444 5. Jones WS, Patel MR, Dai D, Vemulapalli S, Subherwal S, Stafford J, et al. High  
445 mortality risks after major lower extremity amputation in Medicare patients with  
446 peripheral artery disease. *Am Heart J.* 2013 May;165(5):809–815, 815.e1.
- 447 6. Scott SWM, Bowrey S, Clarke D, Choke E, Bown MJ, Thompson JP. Factors  
448 influencing short- and long-term mortality after lower limb amputation. *Anaesthesia.*  
449 2014 Mar;69(3):249–58.
- 450 7. Hoffstad O, Mitra N, Walsh J, Margolis DJ. Diabetes, Lower-Extremity Amputation,  
451 and Death. *Diabetes Care.* 2015 Oct;38(10):1852–7.
- 452 8. Hoffmann M, Kujath P, Flemming A, Proß M, Begum N, Zimmermann M, et al.  
453 Survival of diabetes patients with major amputation is comparable to malignant disease.  
454 *Diab Vasc Dis Res.* 2015 Jul;12(4):265–71.
- 455 9. Rosen N. Mortality and reoperations following lower limb amputations. *Isr Med Assoc*  
456 *J.* 2014;16(2):83–7.
- 457 10. Wiessman MP, Liberty IF, Segev RW, Katz T, Abu Tailakh M, Novack V. Clinical  
458 characteristics and survival of patients with diabetes mellitus following non-traumatic  
459 lower extremity amputation. *Isr Med Assoc J IMAJ.* 2015 Mar;17(3):145–9.
- 460 11. Ahmad N, Thomas GN, Gill P, Chan C, Torella F. Lower limb amputation in England:  
461 prevalence, regional variation and relationship with revascularisation, deprivation and  
462 risk factors. A retrospective review of hospital data. *J R Soc Med.* 2014 Nov  
463 11;0141076814557301.
- 464 12. Heyer K, Debus ES, Mayerhoff L, Augustin M. Prevalence and Regional Distribution of  
465 Lower Limb Amputations from 2006 to 2012 in Germany: A Population based Study.  
466 *Eur J Vasc Endovasc Surg Off J Eur Soc Vasc Surg.* 2015 Sep 22;

- 1  
2  
3 467 13. Humphries MD. Amputation Risk in Patients with Diabetes Mellitus and Peripheral  
4 468 Artery Disease Using Statewide Data. *Ann Vasc Surg.* 2016;30:123–31.
- 5  
6 469 14. Nelson MT, Greenblatt DY, Soma G, Rajimanickam V, Greenberg CC, Kent KC.  
7 470 Preoperative factors predict mortality after major lower-extremity amputation. *Surgery.*  
8 471 2012 Oct;152(4):685-694; discussion 694-696.
- 9  
10 472 15. Dinesh Shah A, Langenberg C, Rapsomaniki E, Denaxas S, Pujades-Rodriguez M, Gale  
11 473 CP, et al. Type 2 diabetes and incidence of a wide range of cardiovascular diseases: a  
12 474 cohort study in 1·9 million people. *Lancet Lond Engl.* 2015 Feb 26;385 Suppl 1:S86.
- 13  
14  
15 475 16. Unwin N, Airey M, Williams R, Bodanskt J, Chell S. Epidemiology of lower extremity  
16 476 amputation in centres in Europe, North America and East Asia. The Global Lower  
17 477 Extremity Amputation Study Group. *BrJSurg.* 2000 Mar;87(0007–1323 (Print)):328–37.
- 18  
19 478 17. Organisation mondiale de la santé. Global status report on noncommunicable diseases  
20 479 2014: attaining the nine global noncommunicable diseases targets; a shared  
21 480 responsibility. Geneva: World Health Organization; 2014.
- 22  
23 481 18. Fowkes FGR, Rudan D, Rudan I, Aboyans V, Denenberg JO, McDermott MM, et al.  
24 482 Comparison of global estimates of prevalence and risk factors for peripheral artery  
25 483 disease in 2000 and 2010: a systematic review and analysis. *Lancet Lond Engl.* 2013  
26 484 Oct 19;382(9901):1329–40.
- 27  
28  
29 485 19. Criqui MH, Aboyans V. Epidemiology of Peripheral Artery Disease. *Circ Res.* 2015  
30 486 Apr 24;116(9):1509–26.
- 31  
32 487 20. Carthy ER. Lower Limb Peripheral Arterial Disease (Clinical Guideline 147): A  
33 488 Guideline Summary. *Ann Med Surg.* 2013 Mar 8;2(1):26–30.
- 34  
35 489 21. Hsu C-Y, Chen Y-T, Su Y-W, Chang C-C, Huang P-H, Lin S-J. Statin therapy reduces  
36 490 future risk of lower limb amputation in patient with diabetes and peripheral artery  
37 491 disease. *J Clin Endocrinol Metab.* 2017 Apr 7;
- 38  
39 492 22. DeCarlo C, Scher L, Shariff S, Phair J, Lipsitz E, Garg K. Statin use and other factors  
40 493 associated with mortality after major lower extremity amputation. *J Vasc Surg.* 2017  
41 494 Apr 18;
- 42  
43 495 23. Buckley CM, Ali F, Roberts GA, Kearney PM, Perry IJ, Bradley CP. Timing of access  
44 496 to secondary healthcare services and lower extremity amputations in patients with  
45 497 diabetes: a case-control study. *BMJ Open Diabetes Res Care.* 2015;3(1):e000069.
- 46  
47  
48 498 24. Humphries MD, Brunson A, Li C-S, Melnikow J, Romano PS. Amputation trends for  
49 499 patients with lower extremity ulcers due to diabetes and peripheral artery disease using  
50 500 statewide data. *J Vasc Surg.* 2016 Dec;64(6):1747–1755.e3.
- 51  
52 501 25. Reinecke H, Unrath M, Freisinger E, Bunzemeier H, Meyborg M, Lüders F, et al.  
53 502 Peripheral arterial disease and critical limb ischaemia: still poor outcomes and lack of  
54 503 guideline adherence. *Eur Heart J.* 2015 Apr 14;36(15):932–8.



- 1  
2  
3 504 26. Sohn M-W. Statin use and lower extremity amputation risk in nonelderly diabetic  
4 505 patients. *J Vasc Surg*. 2013;58(6):1578–1585.e1.
- 5  
6 506 27. Halter JB, Musi N, McFarland Horne F, Crandall JP, Goldberg A, Harkless L, et al.  
7 507 Diabetes and cardiovascular disease in older adults: current status and future directions.  
8 508 *Diabetes*. 2014 Aug;63(8):2578–89.
- 9  
10 509 28. Lynge E, Sandegaard JL, Rebolj M. The Danish National Patient Register. *Scand J*  
11 510 *Public Health*. 2011 Jul 1;39(7 suppl):30–3.
- 12  
13 511 29. Kildemoes HW, Sørensen HT, Hallas J. The Danish National Prescription Registry.  
14 512 *Scand J Public Health*. 2011 Jul 1;39(7 suppl):38–41.
- 15  
16 513 30. Andersen JS, Olivarius NDF, Krasnik A. The Danish National Health Service Register.  
17 514 *Scand J Public Health*. 2011 Jul 1;39(7 suppl):34–7.
- 18  
19 515 31. Pedersen CB. The Danish Civil Registration System. *Scand J Public Health*. 2011  
20 516 Jul;39(7 Suppl):22–5.
- 21  
22 517 32. Elixhauser A, Steiner C, Harris DR, Coffey RM. Comorbidity measures for use with  
23 518 administrative data. *Med Care*. 1998 Jan;36(1):8–27.
- 24  
25 519 33. Charlson ME, Pompei P, Ales KL, MacKenzie CR. A new method of classifying  
26 520 prognostic comorbidity in longitudinal studies: development and validation. *J Chronic*  
27 521 *Dis*. 1987;40(5):373–83.
- 28  
29 522 34. Swaminathan A, Vemulapalli S, Patel MR, Jones WS. Lower extremity amputation in  
30 523 peripheral artery disease: improving patient outcomes. *Vasc Health Risk Manag*.  
31 524 2014;10:417–24.
- 32  
33 525 35. Moxey PW, Hofman D, Hinchliffe RJ, Poloniecki J, Loftus IM, Thompson MM, et al.  
34 526 Volume-outcome relationships in lower extremity arterial bypass surgery. *Ann Surg*.  
35 527 2012 Dec;256(6):1102–7.
- 36  
37 528 36. Society for Vascular Surgery Lower Extremity Guidelines Writing Group, Conte MS,  
38 529 Pomposelli FB, Clair DG, Geraghty PJ, McKinsey JF, et al. Society for Vascular  
39 530 Surgery practice guidelines for atherosclerotic occlusive disease of the lower  
40 531 extremities: management of asymptomatic disease and claudication. *J Vasc Surg*. 2015  
41 532 Mar;61(3 Suppl):2S–41S.
- 42  
43 533 37. Moxey PW, Hofman D, Hinchliffe RJ, Jones K, Thompson MM, Holt PJE.  
44 534 Epidemiological study of lower limb amputation in England between 2003 and 2008. *Br*  
45 535 *J Surg*. 2010 Sep;97(9):1348–53.
- 46  
47 536 38. Danish National Health Board. The consumption of opioids in Denmark. 2016.
- 48  
49 537 39. Papia G, Mayer P, Kelton D, Queen D, Elliott JA, Kuhnke JL. Just leg pain? Think  
50 538 again What health leaders must know about peripheral arterial disease. *Healthc Manage*  
51 539 *Forum*. 2015 Nov 1;28(6 suppl):S5–9.
- 52  
53  
54  
55  
56  
57  
58  
59  
60



- 1  
2  
3 540 40. Farber A, Eberhardt RT. The Current State of Critical Limb Ischemia: A Systematic  
4 541 Review. *JAMA Surg*. 2016 Nov 1;151(11):1070–7.
- 5  
6 542 41. Sillesen H. Peripheral artery disease (PAD) screening in the asymptomatic population:  
7 543 why, how, and who? *Curr Atheroscler Rep*. 2011;13(5):390–5.
- 8  
9 544 42. Beard JD. ABC of arterial and venous disease: Chronic lower limb ischaemia. *BMJ*.  
10 545 2000 Mar 25;320(7238):854–7.
- 11  
12 546 43. Sillesen H, Falk E. Why not screen for subclinical atherosclerosis? *Lancet Lond Engl*.  
13 547 2011 Aug 20;378(9792):645–6.
- 14  
15 548 44. Sigvant B, Henriksson M, Lundin F, Wahlberg E. Asymptomatic peripheral arterial  
16 549 disease: is pharmacological prevention of cardiovascular risk cost-effective? *Eur J*  
17 550 *Cardiovasc Prev Rehabil Off J Eur Soc Cardiol Work Groups Epidemiol Prev Card*  
18 551 *Rehabil Exerc Physiol*. 2011 Apr;18(2):254–61.
- 19  
20  
21 552 45. Vaidya A, Joore MA, Ten Cate-Hoek AJ, Ten Cate H, Severens JL. Screen or not to  
22 553 screen for peripheral arterial disease: guidance from a decision model. *BMC Public*  
23 554 *Health*. 2014;14:89.
- 24  
25 555 46. Brand PW. Tenderizing the foot. *Foot Ankle Int*. 2003;24(6):457–61.
- 26  
27 556 47. Boulton AJM, Vileikyte L, Ragnarson-Tennvall G, Apelqvist J. The global burden of  
28 557 diabetic foot disease. *Lancet Lond Engl*. 2005 Nov 12;366(9498):1719–24.
- 29  
30 558 48. Moxey PW, Hofman D, Hinchliffe RJ, Poloniecki J, Loftus IM, Thompson MM, et al.  
31 559 Delay influences outcome after lower limb major amputation. *Eur J Vasc Endovasc*  
32 560 *Surg Off J Eur Soc Vasc Surg*. 2012 Nov;44(5):485–90.
- 33  
34  
35 561  
36  
37  
38  
39  
40  
41  
42  
43  
44  
45  
46  
47  
48  
49  
50  
51  
52  
53  
54  
55  
56  
57  
58  
59  
60

Table 1. Characteristics of patients with lower extremity amputations in 2010-2011 in Denmark

|                                            | Total<br>N (%) | Major amputation    |                     | Minor amputation |
|--------------------------------------------|----------------|---------------------|---------------------|------------------|
|                                            |                | Above-Knee<br>N (%) | Below-Knee<br>N (%) | N (%)            |
| n                                          | n=2883         | n = 1024            | n=758               | n=1101           |
| <b>Gender</b>                              |                |                     |                     |                  |
| Male                                       | 1811 (63)      | 544 (53)            | 489 (65)            | 778 (71)         |
| <b>Age</b>                                 |                |                     |                     |                  |
| Men, median (IQR)                          | 69 (61;79)     | 74 (66;82)          | 70 (60;78)          | 66 (58;76)       |
| Women, median (IQR)                        | 78 (68;86)     | 81 (72;87)          | 78 (68;85)          | 72 (63;82)       |
| <b>Social status<sup>1</sup></b>           |                |                     |                     |                  |
| Married <sup>2</sup>                       | 1165 (40)      | 378 (37)            | 307 (41)            | 480 (44)         |
| Divorced                                   | 937 (32)       | 293 (29)            | 247 (33)            | 397 (36)         |
| Widow                                      | 767 (27)       | 352 (34)            | 200 (26)            | 217 (20)         |
| <b>Economic status</b>                     |                |                     |                     |                  |
| Working                                    | 257 (9)        | 24 (2)              | 62 (8)              | 171 (16)         |
| Retired                                    | 2055 (71)      | 845 (83)            | 534 (71)            | 676 (61)         |
| Social welfare                             | 571 (20)       | 155 (15)            | 162 (21)            | 254 (23)         |
| <b>Living arrangement</b>                  |                |                     |                     |                  |
| Living alone                               | 1514 (53)      | 595 (58)            | 402 (53)            | 517 (47)         |
| Living in rural areas                      | 1705 (59)      | 634 (62)            | 431 (57)            | 640 (58)         |
| <b>Education</b>                           |                |                     |                     |                  |
| < 9 year of school                         | 2549 (88)      | 896 (88)            | 662 (87)            | 999 (90)         |
| <b>Charlson Index</b>                      |                |                     |                     |                  |
| 0-1                                        | 546 (19)       | 196 (19)            | 133 (17)            | 217 (20)         |
| 2                                          | 456 (16)       | 217 (21)            | 105 (14)            | 134 (12)         |
| 3                                          | 1881 (65)      | 611 (60)            | 520 (69)            | 750 (68)         |
| <b>Multi-morbidities and Polypharmacy</b>  |                |                     |                     |                  |
| Co-morbidities <sup>3</sup> , median (IQR) | 7 (5;9)        | 6 (5;9)             | 7 (5;10)            | 7 (4;9)          |
| Drugs <sup>4</sup> , median (IQR)          | 7 (5;9)        | 7 (5;9)             | 7 (5;9)             | 6 (4;8)          |
| <b>Peripheral vascular procedure</b>       |                |                     |                     |                  |
| Angioplasty                                | 89 (3)         | 7 (1)               | 4 (1)               | 78 (7)           |
| Bypass graft                               | 97 (3)         | 5 (0,5)             | 4 (1)               | 88 (8)           |
| <b>Surgery history</b>                     |                |                     |                     |                  |
| Previous amputation                        | 266 (9)        | 113 (11)            | 107 (14)            | 46 (4)           |
| < 3 amputations                            | 203 (7)        | 84 (8)              | 76 (14)             | 43 (4)           |
| ≥ 3 amputations                            | 63 (2)         | 29 (3)              | 31 (4)              | 3 (-)            |

Values represent the number of patients (%), unless indicated otherwise. <sup>1</sup>Missing n=12. <sup>2</sup>Married or residing with a partner. <sup>3</sup>All ICD10 diagnoses. <sup>4</sup>ACTcodes for main groups

Table 2. Prevalence of comorbidity among patients with lower extremity amputations in 2010-2011 in Denmark

|                                      | Major amputations |            |            | Minor amputations |          |
|--------------------------------------|-------------------|------------|------------|-------------------|----------|
|                                      | Total, N (%)      | Above Knee | Below Knee | Total, N (%)      | P value* |
|                                      |                   | n (%)      | n (%)      |                   |          |
|                                      | N=1782            | N=1024     | N=758      | N=1101            |          |
| Peripheral Vascular Disorders        | 1481 (83)         | 873 (85)   | 608 (80)   | 625 (57)          | <.0001   |
| Atherosclerosis <sup>1</sup>         | 1428 (80)         | 844 (82)   | 584 (77)   | 589 (54)          | <.0001   |
| Hypertension <sup>2</sup>            | 902 (51)          | 577 (56)   | 441 (58)   | 599 (54)          | .18      |
| Diabetes <sup>2</sup>                | 697 (39)          | 331 (32)   | 366 (48)   | 710 (64)          | <.0001   |
| Diabetic foot ulcer <sup>3</sup>     | 505 (18)          | 224 (22)   | 281 (37)   | 522 (47)          | <.0001   |
| Neuropathy <sup>3</sup>              | 174 (6)           | 69 (7)     | 105 (14)   | 230 (21)          | <.0001   |
| Retinopathy <sup>3</sup>             | 112 (6)           | 37 (4)     | 75 (10)    | 141 (13)          | <.0001   |
| Nephropathy <sup>3</sup>             | 85 (5)            | 22 (2)     | 63 (8)     | 82 (7)            | .0028    |
| Cardiac ischaemia <sup>3</sup>       | 597 (34)          | 348 (34)   | 249 (33)   | 329 (30)          | .04      |
| Cardiac Arrhythmia                   | 536 (30)          | 319 (31)   | 215 (28)   | 232 (21)          | <.0001   |
| Cerebrovascular disease <sup>4</sup> | 540 (30)          | 317 (31)   | 223 (29)   | 195 (18)          | <.0001   |
| Congestive Heart Failure             | 401 (23)          | 228 (22)   | 173 (23)   | 191 (17)          | .0009    |
| Stroke <sup>3</sup>                  | 401 (23)          | 234 (23)   | 167 (22)   | 144 (13)          | <.0001   |
| Arthrosis <sup>3</sup>               | 320 (18)          | 202 (20)   | 118 (16)   | 195 (18)          | .86      |
| Chronic Pulmonary Diseases           | 356 (20)          | 227 (22)   | 129 (17)   | 129 (12)          | <.0001   |
| Fluid & electrolyte disorders        | 330 (19)          | 211 (21)   | 119 (16)   | 123 (11)          | <.0001   |
| Emboli <sup>3</sup>                  | 359 (20)          | 231 (23)   | 128 (17)   | 88 (8)            | <.0001   |
| Renal Failure                        | 252 (14)          | 129 (13)   | 123 (16)   | 133 (12)          | .11      |
| Tumor without Metastasis             | 243 (14)          | 143 (14)   | 100 (13)   | 107 (10)          | .0018    |
| Alcohol addiction                    | 227 (13)          | 121 (12)   | 106 (14)   | 122 (11)          | .18      |
| Obesity                              | 130 (7)           | 60 (6)     | 70 (9)     | 127 (12)          | .0001    |
| Rheumatoid Arthritis                 | 139 (8)           | 77 (8)     | 62 (8)     | 90 (8)            | .71      |
| Depression                           | 124 (7)           | 77 (8)     | 47 (6)     | 58 (5)            | .069     |
| Dementia <sup>5</sup>                | 110 (6)           | 69 (7)     | 43 (6)     | 37 (3)            | .0006    |
| Liver disease                        | 79 (4)            | 40 (4)     | 39 (5)     | 51 (5)            | .80      |
| Metastatic Cancer                    | 50 (3)            | 36 (3)     | 14 (2)     | 9 (1)             | .0002    |
| Weight loss                          | 43 (2)            | 30 (3)     | 13 (2)     | 12 (1)            | .0155    |
| Bone Cancer <sup>3</sup>             | 24 (1)            | 14 (1)     | 10 (1)     | 2 (-)             | .0013    |

\*P<0.05, major vs. minor amputation. Comorbidity, defined according to Elixhauser Comorbidity index;<sup>1</sup> includes only ICD10- I170; <sup>2</sup> includes uncomplicated and complicated conditions; <sup>3</sup> not included in the Elixhauser Comorbidity index; <sup>4</sup> included from the Charlson Comorbidity index

563  
564  
565

Table 3. Prevalence of prescribed medications used by patients with lower extremity amputations in 2010-2011 in Denmark

|                            | Major amputations |            |            | Minor amputations |          |
|----------------------------|-------------------|------------|------------|-------------------|----------|
|                            | Total, N (%)      | Above Knee | Below Knee | Total, N (%)      | P value* |
|                            |                   | n (%)      | n (%)      |                   |          |
|                            | N=1782            | N=1024     | N=758      | N=1101            |          |
| Opioids                    | 1484 (83)         | 876 (86)   | 608 (80)   | 684 (62)          | <.0001   |
| Antithrombotic drugs       | 1262 (71)         | 738 (72)   | 524 (69)   | 711 (65)          | .0005    |
| Acetaminophen              | 1333 (75)         | 802 (78)   | 531 (70)   | 621 (56)          | <.0001   |
| Antihypertensives          | 1000 (56)         | 577 (56)   | 423 (56)   | 715 (65)          | <.0001   |
| Cholesterol-lowering drugs | 886 (50)          | 481 (47)   | 405 (53)   | 627 (57)          | .0002    |
| Neuropathic pain relievers | 919 (52)          | 517 (50)   | 402 (53)   | 330 (30)          | <.0001   |
| Antidepressants            | 864 (48)          | 501 (49)   | 363 (48)   | 365 (33)          | <.0001   |
| Antidiabetic therapy       | 588 (33)          | 268 (26)   | 320 (42)   | 638 (58)          | <.0001   |
| Beta blockers              | 760 (43)          | 440 (43)   | 320 (42)   | 439 (40)          | 0.14     |
| NSAID                      | 451 (25)          | 264 (26)   | 187 (25)   | 312 (28)          | 0.07     |
| Drugs for airway disease   | 337 (19)          | 199 (19)   | 138 (18)   | 146 (14)          | <.0001   |
| Alcohol addiction          | 341 (19)          | 198 (20)   | 143 (19)   | 122 (11)          | <.0001   |
| Smoking cessation          | 259 (15)          | 155 (15)   | 104 (14)   | 132 (12)          | .053     |
| Cortisol                   | 246 (14)          | 156 (15)   | 90 (12)    | 120 (11)          | .023     |

\*P<0.05, major vs. minor amputation

566  
567

Table 4. Characteristics and comorbidities among patients with lower extremity amputation diagnosed with cardio vascular diseases, diabetes or without in 2010-2011.

|                              | In risk of Lower limb amputation |                                           | No CVD or diabetes    |          | P value*            |
|------------------------------|----------------------------------|-------------------------------------------|-----------------------|----------|---------------------|
|                              | N=2636                           | Cardiovascular disease (CVD)<br>N=1185(%) | Diabetes<br>N=1451(%) | N=247(%) |                     |
| <b>Characteristics</b>       |                                  |                                           |                       |          |                     |
| Male                         | 1680 (64)                        | 637 (54)                                  | 1043 (72)             | 131 (53) | <.0001              |
| Married                      | 1058 (40)                        | 430 (36)                                  | 628 (43)              | 107 (43) | 0.0003              |
| working                      | 197 (7)                          | 46 (4)                                    | 151 (10)              | 60 (24)  | <.0001 <sup>1</sup> |
| Retired                      | 1943 (74)                        | 985 (83)                                  | 958 (66)              | 112 (45) |                     |
| Social welfare               | 496 (19)                         | 154 (13)                                  | 342 (24)              | 75 (30)  |                     |
| Living in rural areas        | 1548 (59)                        | 704 (59)                                  | 844 (58)              | 157 (64) | 0.5                 |
| Charlson index, 0-1          | 376 (14)                         | 322 (27)                                  | 54 (4)                | 170 (69) | <.0001 <sup>2</sup> |
| 2                            | 411 (16)                         | 314 (27)                                  | 97 (7)                | 45 (18)  |                     |
| 3                            | 1849 (70)                        | 549 (46)                                  | 1300 (90)             | 32 (13)  |                     |
| Previous amputation          | 252 (10)                         | 55 (5)                                    | 197 (14)              | 14 (6)   | <.0001              |
| <b>Multi-morbidities</b>     |                                  |                                           |                       |          |                     |
| Co-morbidities, median (IQR) | 8 (6;10)                         | 6 (5;8)                                   | 10 (7;12)             | 1 (0;2)  | <.0001              |
| Drugs, median (IQR)          | 7 (5;9)                          | 6 (4;8)                                   | 8 (6;10)              | 3 (2;5)  | <.0001              |
| Ulcer                        | 1360 (52)                        | 489 (41)                                  | 871 (60)              | 80 (32)  | <.0001              |
| Hypertension                 | 1397 (53)                        | 519 (44)                                  | 878 (61)              | 34 (14)  | <.0001              |
| Arthrosis                    | 454 (17)                         | 227 (19)                                  | 227 (16)              | 61 (25)  | 0.02                |
| Chronic Pulmonary Diseases   | 466 (18)                         | 250 (21)                                  | 216 (15)              | 19 (8)   | <.0001              |
| Tumour without Metastasis    | 310 (12)                         | 178 (15)                                  | 132 (9)               | 40 (16)  | <.0001              |
| Alcohol addiction            | 319 (12)                         | 156 (13)                                  | 163 (11)              | 30 (12)  | 0.1                 |
| Obesity                      | 252 (10)                         | 28 (2)                                    | 224 (15)              | 5 (2)    | <.0001              |
| Rheumatoid Arthritis         | 203 (8)                          | 110 (9)                                   | 93 (6)                | 26 (11)  | 0.006               |
| Liver disease                | 109 (4)                          | 41 (3)                                    | 68 (5)                | 21 (9)   | 0.1                 |
| Metastatic Cancer            | 52 (2)                           | 40 (3)                                    | 12 (1)                | 7 (3)    | <.0001              |
| <b>Prescribed medication</b> |                                  |                                           |                       |          |                     |
| Opioids                      | 2027 (77)                        | 93 (84)                                   | 1034 (71)             | 141 (57) | <.0001              |
| Cholesterol-lowering drugs   | 1483 (56)                        | 543 (46)                                  | 940 (65)              | 30 (12)  | <.0001              |
| Antithrombotic drugs         | 1919 (73)                        | 855 (72)                                  | 1064 (73)             | 54 (22)  | 0.5                 |
| Antihypertensive             | 1647 (62)                        | 611 (52)                                  | 1036 (71)             | 68 (28)  | <.0001              |
| Neuropathic pain relievers   | 1162 (44)                        | 580 (49)                                  | 582 (40)              | 87 (35)  | <.0001              |
| Beta blockers                | 1161 (44)                        | 475 (40)                                  | 686 (47)              | 38 (15)  | .0002               |
| Alcohol addiction            | 420 (16)                         | 226 (19)                                  | 194 (13)              | 43 (17)  | <.0001              |
| Drugs for airway disease     | 459 (17)                         | 240 (20)                                  | 219 (15)              | 24 (10)  | .0005               |

\*P<0.05, Cardiovascular disease vs diabetes.

CVD includes Atherosclerosis, Peripheral Vascular Disorders, Cardiac ischemia, Emboli, Stroke, Cerebrovascular disease. Diabetes includes antidiabetic therapy.

<sup>1</sup>P value represents the distribution of working, retired and social welfare between patients with CVD, diabetes or without.

<sup>2</sup> P value represents the distribution of Charlson Index between patients with CVD, diabetes or without.

568  
569  
570  
571  
572  
573  
574

1  
2  
3 575 **Figures titles and legends**

4 576  
5 577 **Figure 1**

6 578  
7 579 Title: Figure 1. Flowchart shows study selection of patients with lower extremity amputations  
8  
9 580 between 01.01.2010 -31.12.2011 in Denmark

10  
11 581 Legends: (1) Excluded due to previous amputation define as amputation on the same level  
12  
13 582 or bilateral amputation on a higher level than the index amputation in 2010-11; (2) include  
14  
15 583 hip-exarticulation; (3) include knee disarticulation.

16  
17 584  
18 585 **Figure 2**

19 586  
20 587 Title: Figure 2. The prevalence of comorbidities and prescribed medications during the 14  
21  
22 588 years preceding major and minor lower extremity amputations.

23  
24 589 **Figure 3**

25 590  
26 591 Title: Figure 3. 14 years of estimated progression of chronic diseases and contacts to  
27  
28 592 healthcare system preceding (a,c) major and (b,d) minor lower extremity amputations  
29  
30 593 Legends: The prevalence of comorbidities, defined by both ICD-10 coding and the use of  
31  
32 594 prescribed medications (ACT code), was estimated each year.

33  
34 595  
35 596 **Figure 4**

36  
37 597 Title: Figure 4. One-year cumulative outcomes. The cumulative probabilities of (*left*) re-  
38  
39 598 amputation procedures and (*right*) survival are shown for patients that received major (AKA  
40  
41 599 and BKA) and minor lower extremity amputations

42  
43 600  
44 601  
45  
46  
47  
48  
49  
50  
51  
52  
53  
54  
55  
56  
57  
58  
59  
60

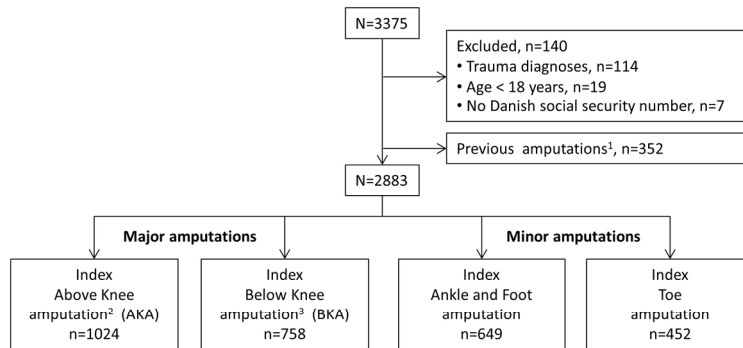

32 Title: Figure 1. Flowchart shows study selection of patients with lower extremity amputations between  
33 01.01.2010 -31.12.2011 in Denmark

34 Legends: (1) Excluded due to previous amputation define as amputation on the same level or bilateral  
35 amputation on a higher level than the index amputation in 2010-11; (2) include hip-exarticulation; (3)  
36 include knee disarticulation.

37 190x142mm (300 x 300 DPI)

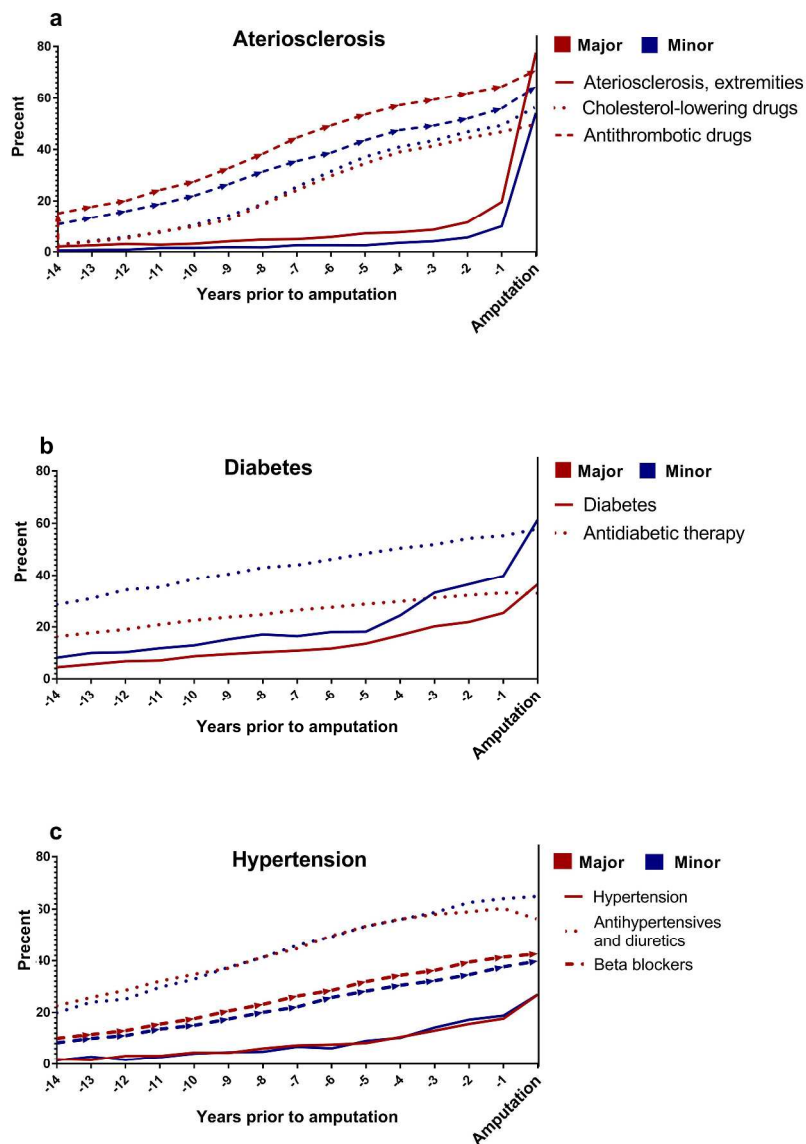

Title: Figure 2. The prevalence of comorbidities and prescribed medications during the 14 years preceding major and minor lower extremity amputations.

285x396mm (300 x 300 DPI)



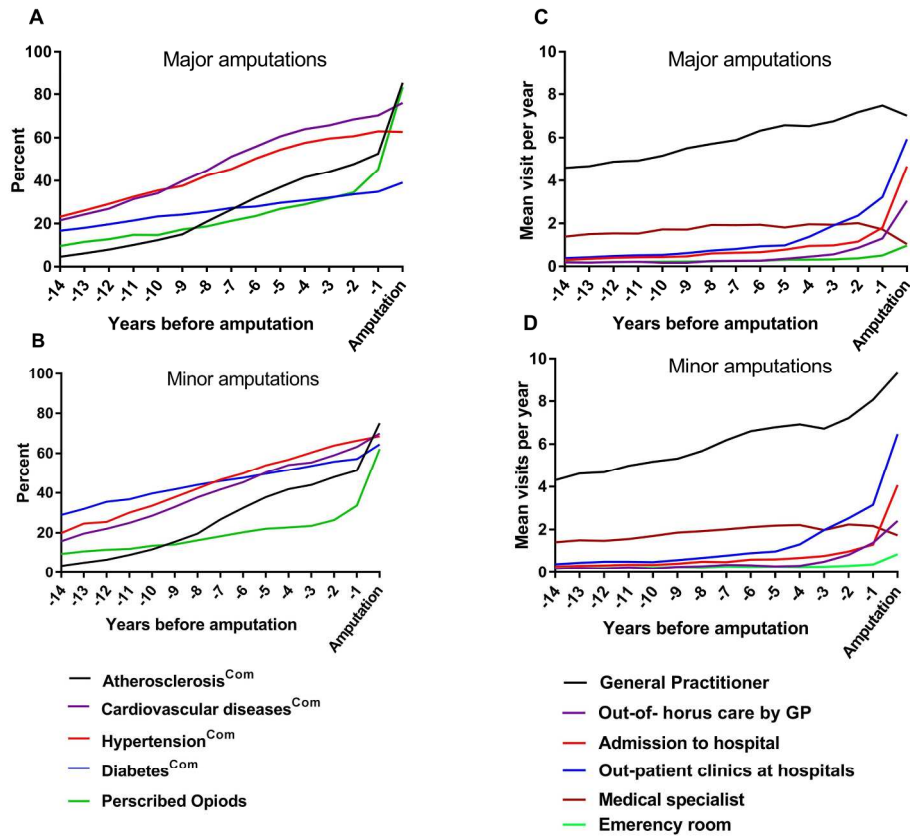

Title: Figure 3. 14 years of estimated progression of chronic diseases and contacts to healthcare system preceding (a,c) major and (b,d) minor lower extremity amputations  
 Legends: The prevalence of comorbidities, defined by both ICD-10 coding and the use of prescribed medications (ACT code), was estimated each year.

206x184mm (300 x 300 DPI)

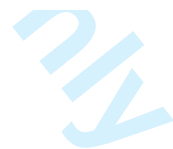

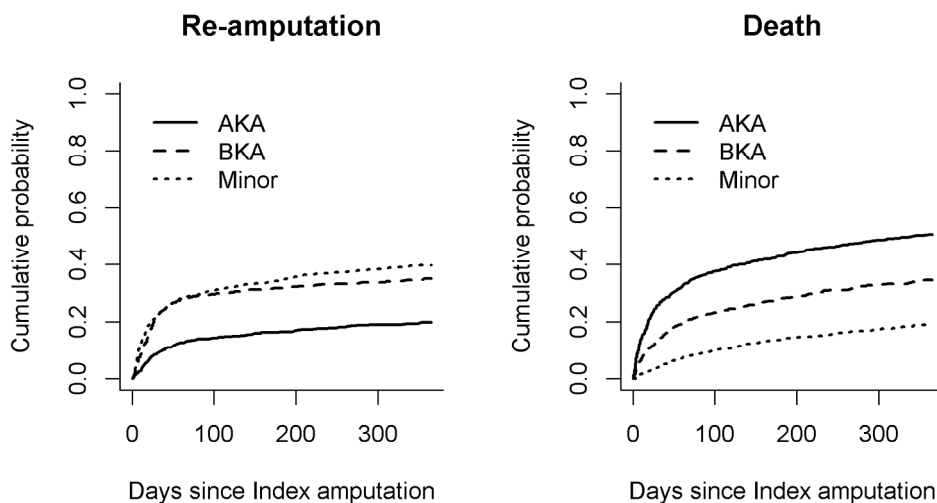

Title: Figure 4. One-year cumulative outcomes. The cumulative probabilities of (left) re-amputation procedures and (right) survival are shown for patients that received major (AKA and BKA) and minor lower extremity amputations

177x101mm (300 x 300 DPI)

Review only

Progression of disease preceding lower extremity amputation in Denmark: A longitudinal registry study of diagnoses, use of medication and healthcare services 14 years prior to amputation

## Supplementary material

### SKS codes for surgical procedure, identification of index amputation

#### Above Knee Amputation (AKA)

- |                          |                  |
|--------------------------|------------------|
| Hip-exarticulation       | (KNFQ09)         |
| Trans-Femoral amputation | (KNFQ19, KNFQ99) |

#### Below Knee Amputation (BKA)

- |                         |                         |
|-------------------------|-------------------------|
| Knee disarticulation    | (KNGQ09)                |
| Trans-Tibial amputation | (KNGQ19, KNGQ99)        |
| Foot amputation         | (KNHQ00-08)             |
| Toe amputation          | (KNHQ10-18, KNHQ 90-99) |

### Rank of amputation procedure

- |                                                                                                              |                          |
|--------------------------------------------------------------------------------------------------------------|--------------------------|
| 1. Hip-exarticulation                                                                                        | (KNFQ09)                 |
| 2. Trans-Femoral amputation                                                                                  | (KNFQ19, KNFQ99)         |
| 3. Knee disarticulation                                                                                      | (KNGQ09)                 |
| 4. Trans-Tibial amputation                                                                                   | (KNGQ19, KNGQ99)         |
| 5. Foot amputation                                                                                           | (KNHQ10-18, KNHQ 90-99)  |
| 6. Revision of stump or related amputation procedure after Hip-exarticulation or<br>Trans-Femoral amputation | (KNFQ29, KNFQ39, KNFQ49) |
| 7. Revision of stump or related procedure after Knee disarticulation or<br>Trans-Tibial amputation           | (KNGQ29, KNGQ39, KNGQ49) |
| 8. Toe amputation                                                                                            | (KNHQ00-08)              |
| 9. Stump revision of foot<br>or toe amputation                                                               | (KNHQ20-28)              |

Progression of disease preceding lower extremity amputation in Denmark: A longitudinal registry study of diagnoses, use of medication and healthcare services 14 years prior to amputation

#### ICD10 code for diagnosis

|                              |                                           |
|------------------------------|-------------------------------------------|
| Atherosclerosis              | DI70                                      |
| Atherosclerosis, extremities | D1702                                     |
| Diabetes                     |                                           |
| Neuropathy                   | DE104, DE114, DE124, DE134, DE144         |
| Retinopathy                  | DE103, DE113, DE123, DE133, DE143         |
| Nephropathy                  | DE102, DE122, DE132, DE142                |
| Foot ulcer                   | DE105, DE115, DE125, DE135, DE145         |
| Ulcer                        | DI97, DL88, DI89, DL984, DS91, DR02, DL02 |
| Apoplexia                    | DI60, DI61, DI62, DI63, DI64              |
| Emboli                       | DI80, DI81, DI82, DI74                    |
| Bone cancer                  | DC40, DC41, DC49                          |
| Arthrosis                    | DM15, DM16, DM17, DM18, DM19              |

#### ACT codes for medication

|                                  |                                            |
|----------------------------------|--------------------------------------------|
| Antidiabetic therapy             |                                            |
| Insulins                         | A10A                                       |
| Blood Glucose lowering drugs     | A10B                                       |
| Antithrombotic drugs             | B01A                                       |
| Drugs for hypertension           |                                            |
| Antihypertensives                | C02DB, C02CA, C08, C09                     |
| Diuretics, Thiazides, plan       | C03AA - Eller hele gruppen C03 Diuretics ? |
| Beta blockers                    | C07                                        |
| Cholesterol-lowering drugs       | C10AA, C10AB, C10AD, C10AX, C10B           |
| Corticosteroids for systemic use | H02A                                       |
| Obstructive airway disease       | R03                                        |
| Opioids                          | N02A                                       |
| Codeine                          | R05DA04                                    |
| Acetaminophen                    | N02B                                       |
| NSAID                            | M01A                                       |
| Neuropathic pain relievers       |                                            |
| Antiepileptics drugs             | N03AX                                      |
| Antidepressants                  | N06AA, N06AX                               |
| Drugs for alcohol addiction      | N07BB, N03AA, N05BA                        |
| Drugs for smoking cessation      | N07BA, N06AX,                              |

Progression of disease preceding lower extremity amputation in Denmark: A longitudinal registry study of diagnoses, use of medication and healthcare services 14 years prior to amputation

### Codes used to estimate the progression of diseases over 14 years prior to amputation by combining diagnosis and prescribed medication

#### *Atherosclerosis<sup>Com</sup>*

|                            |                                           |
|----------------------------|-------------------------------------------|
| Arteriosclerosis           | ICD code DI70                             |
| Cholesterol-lowering drugs | ACT code C10AA, C10AB, C10AD, C10AX, C10B |

#### *Diabetes<sup>Com</sup>*

|                      |                                       |
|----------------------|---------------------------------------|
| Diabetes             | ICD code DE10, DE11, DE12, DE13, DE14 |
| Antidiabetic therapy | ACT code A10A, A10B                   |

#### *Cardiovascular diseases<sup>Com</sup>*

|                                               |                                              |
|-----------------------------------------------|----------------------------------------------|
| Cardiac ischemia                              | ICD code DI20, DI21, DI22, DI23, DI24, DI25, |
| Congestive heart failure, cardiac arrhythmia, | Elx_GRP_1, ELX_GRP_2                         |
| Beta blockers, Antithrombotic drugs           | ACT code C07, B01A                           |

#### *Hypertension<sup>Com</sup>*

|                        |                                        |
|------------------------|----------------------------------------|
| Hypertension           | ICD code DI10, DI11, DI12, DI13, DI15  |
| Drugs for hypertension | ACT code C02DB, C02CA, C03AA, C08, C09 |

#### *Prescribed opioids*

|                   |                        |
|-------------------|------------------------|
| ACT code, opioids | ACT code N02A, R05DA04 |
|-------------------|------------------------|

### Subgroup analysis according to diseases

#### *CVD*

|                                               |                                              |
|-----------------------------------------------|----------------------------------------------|
| Arteriosclerosis                              | ICD code DI70                                |
| Cardiac ischemia                              | ICD code DI20, DI21, DI22, DI23, DI24, DI25, |
| Congestive heart failure, cardiac arrhythmia, | Elx_GRP_1, ELX_GRP_2                         |
| Emboli                                        | DI80, DI81, DI82, DI74                       |
| Stroke                                        | DI60, DI61, DI62, DI63, DI64, DG45, DG46     |
| Cerebrocardiovascular disease                 | CC_GRP_4                                     |

#### *Diabetes:*

|                         |  |
|-------------------------|--|
| Diabetes <sup>Com</sup> |  |
|-------------------------|--|

#### *In risk of LEA*

|                                                     |  |
|-----------------------------------------------------|--|
| Group "CVD" and "Diabetes <sup>Com</sup> " combined |  |
|-----------------------------------------------------|--|

#### *No CVD or Diabetes*

Patient not included in the group "In risk of LEA"

**Note:** ELX\_GRP\_x refers to The Elixhauser Comorbidity Index, CC\_GRP\_X refers to Charlson Comorbidity Index

STROBE 2007 (v4) Statement—Checklist of items that should be included in reports of *cohort studies*

| Section/Topic                | Item # | Recommendation                                                                                                                                                                       | Reported on page # |
|------------------------------|--------|--------------------------------------------------------------------------------------------------------------------------------------------------------------------------------------|--------------------|
| Title and abstract           | 1      | (a) Indicate the study's design with a commonly used term in the title or the abstract                                                                                               | Title page, p 2    |
|                              |        | (b) Provide in the abstract an informative and balanced summary of what was done and what was found                                                                                  | p 2                |
| <b>Introduction</b>          |        |                                                                                                                                                                                      |                    |
| Background/rationale         | 2      | Explain the scientific background and rationale for the investigation being reported                                                                                                 | page 4-5           |
| Objectives                   | 3      | State specific objectives, including any prespecified hypotheses                                                                                                                     | Page 5             |
| <b>Methods</b>               |        |                                                                                                                                                                                      |                    |
| Study design                 | 4      | Present key elements of study design early in the paper                                                                                                                              | Page 6             |
| Setting                      | 5      | Describe the setting, locations, and relevant dates, including periods of recruitment, exposure, follow-up, and data collection                                                      | Page 6,7           |
| Participants                 | 6      | (a) Give the eligibility criteria, and the sources and methods of selection of participants. Describe methods of follow-up                                                           | Page 7             |
|                              |        | (b) For matched studies, give matching criteria and number of exposed and unexposed                                                                                                  |                    |
| Variables                    | 7      | Clearly define all outcomes, exposures, predictors, potential confounders, and effect modifiers. Give diagnostic criteria, if applicable                                             | Page 7-8           |
| Data sources/<br>measurement | 8*     | For each variable of interest, give sources of data and details of methods of assessment (measurement). Describe comparability of assessment methods if there is more than one group | Page 8             |
| Bias                         | 9      | Describe any efforts to address potential sources of bias                                                                                                                            |                    |
| Study size                   | 10     | Explain how the study size was arrived at                                                                                                                                            | Page 7             |
| Quantitative variables       | 11     | Explain how quantitative variables were handled in the analyses. If applicable, describe which groupings were chosen and why                                                         | Page 7,8           |
| Statistical methods          | 12     | (a) Describe all statistical methods, including those used to control for confounding                                                                                                | Page 9             |
|                              |        | (b) Describe any methods used to examine subgroups and interactions                                                                                                                  | Page 9             |
|                              |        | (c) Explain how missing data were addressed                                                                                                                                          |                    |
|                              |        | (d) If applicable, explain how loss to follow-up was addressed                                                                                                                       |                    |
|                              |        | (e) Describe any sensitivity analyses                                                                                                                                                |                    |
| <b>Results</b>               |        |                                                                                                                                                                                      |                    |

|                          |     |                                                                                                                                                                                                                                                                                                                                                                                                               |                        |
|--------------------------|-----|---------------------------------------------------------------------------------------------------------------------------------------------------------------------------------------------------------------------------------------------------------------------------------------------------------------------------------------------------------------------------------------------------------------|------------------------|
| Participants             | 13* | (a) Report numbers of individuals at each stage of study—eg numbers potentially eligible, examined for eligibility, confirmed eligible, included in the study, completing follow-up, and analysed<br>(b) Give reasons for non-participation at each stage<br>(c) Consider use of a flow diagram                                                                                                               | Page 10,<br>(Figure 1) |
| Descriptive data         | 14* | (a) Give characteristics of study participants (eg demographic, clinical, social) and information on exposures and potential confounders<br>(b) Indicate number of participants with missing data for each variable of interest<br>(c) Summarise follow-up time (eg, average and total amount)                                                                                                                | Page 10,<br>(Table1)   |
| Outcome data             | 15* | Report numbers of outcome events or summary measures over time                                                                                                                                                                                                                                                                                                                                                | Page 11-12             |
| Main results             | 16  | (a) Give unadjusted estimates and, if applicable, confounder-adjusted estimates and their precision (eg, 95% confidence interval). Make clear which confounders were adjusted for and why they were included<br>(b) Report category boundaries when continuous variables were categorized<br>(c) If relevant, consider translating estimates of relative risk into absolute risk for a meaningful time period | Page 13<br><br>Tabel 1 |
| Other analyses           | 17  | Report other analyses done—eg analyses of subgroups and interactions, and sensitivity analyses                                                                                                                                                                                                                                                                                                                |                        |
| <b>Discussion</b>        |     |                                                                                                                                                                                                                                                                                                                                                                                                               |                        |
| Key results              | 18  | Summarise key results with reference to study objectives                                                                                                                                                                                                                                                                                                                                                      | Page 13                |
| <b>Limitations</b>       |     |                                                                                                                                                                                                                                                                                                                                                                                                               |                        |
| Interpretation           | 20  | Give a cautious overall interpretation of results considering objectives, limitations, multiplicity of analyses, results from similar studies, and other relevant evidence                                                                                                                                                                                                                                    | Page 14,15,16          |
| Generalisability         | 21  | Discuss the generalisability (external validity) of the study results                                                                                                                                                                                                                                                                                                                                         | Page 16                |
| <b>Other information</b> |     |                                                                                                                                                                                                                                                                                                                                                                                                               |                        |
| Funding                  | 22  | Give the source of funding and the role of the funders for the present study and, if applicable, for the original study on which the present article is based                                                                                                                                                                                                                                                 | Page 18                |

\*Give information separately for cases and controls in case-control studies and, if applicable, for exposed and unexposed groups in cohort and cross-sectional studies.

**Note:** An Explanation and Elaboration article discusses each checklist item and gives methodological background and published examples of transparent reporting. The STROBE checklist is best used in conjunction with this article (freely available on the Web sites of PLoS Medicine at <http://www.plosmedicine.org/>, Annals of Internal Medicine at <http://www.annals.org/>, and Epidemiology at <http://www.epidem.com/>). Information on the STROBE Initiative is available at [www.strobe-statement.org](http://www.strobe-statement.org).
