# Supplementary material for: Progression of disease preceding lower extremity amputation in Denmark: a longitudinal registry study of diagnoses, use of medication and healthcare services 14 years prior to amputation
Source: PubMed Central journal article supplement — BMJ Open. 2017 Nov 3;7(11):e016030. doi: 10.1136/bmjopen-2017-016030 (PMC5695421; doi:10.1136/bmjopen-2017-016030), 2017-11-03
Supplement: bmjopen-2017-016030supp001.pdf [file bmjopen-2017-016030supp001.pdf]

## Supplementary material

### **SKS codes for surgical procedure, identification of index amputation**

#### Above Knee Amputation (AKA)

|                          |                  |
|--------------------------|------------------|
| Hip-exarticulation       | (KNFQ09)         |
| Trans-Femoral amputation | (KNFQ19, KNFQ99) |

#### Below Knee Amputation (BKA)

|                         |                         |
|-------------------------|-------------------------|
| Knee disarticulation    | (KNGQ09)                |
| Trans-Tibial amputation | (KNGQ19, KNGQ99)        |
| Foot amputation         | (KNHQ00-08)             |
| Toe amputation          | (KNHQ10-18, KNHQ 90-99) |

### **Rank of amputation procedure**

|                                                                                                              |                          |
|--------------------------------------------------------------------------------------------------------------|--------------------------|
| 1. Hip-exarticulation                                                                                        | (KNFQ09)                 |
| 2. Trans-Femoral amputation                                                                                  | (KNFQ19, KNFQ99)         |
| 3. Knee disarticulation                                                                                      | (KNGQ09)                 |
| 4. Trans-Tibial amputation                                                                                   | (KNGQ19, KNGQ99)         |
| 5. Foot amputation                                                                                           | (KNHQ10-18, KNHQ 90-99)  |
| 6. Revision of stump or related amputation procedure after Hip-exarticulation or<br>Trans-Femoral amputation | (KNFQ29, KNFQ39, KNFQ49) |
| 7. Revision of stump or related procedure after Knee disarticulation or<br>Trans-Tibial amputation           | (KNGQ29, KNGQ39, KNGQ49) |
| 8. Toe amputation                                                                                            | (KNHQ00-08)              |
| 9. Stump revision of foot<br>or toe amputation                                                               | (KNHQ20-28)              |

### ICD10 code for diagnosis

|                              |                                           |
|------------------------------|-------------------------------------------|
| Atherosclerosis              | DI70                                      |
| Atherosclerosis, extremities | D1702                                     |
| Diabetes                     |                                           |
| Neuropathy                   | DE104, DE114, DE124, DE134, DE144         |
| Retinopathy                  | DE103, DE113, DE123, DE133, DE143         |
| Nephropathy                  | DE102, DE122, DE132, DE142                |
| Foot ulcer                   | DE105, DE115, DE125, DE135, DE145         |
| Ulcer                        | D197, DL88, DI89, DL984, DS91, DR02, DL02 |
| Apoplexia                    | DI60, DI61, DI62, DI63, DI64              |
| Emboli                       | DI80, DI81, DI82, DI74                    |
| Bone cancer                  | DC40, DC41, DC49                          |
| Arthrosis                    | DM15, DM16, DM17, DM18, DM19              |

### ACT codes for medication

|                                  |                                            |
|----------------------------------|--------------------------------------------|
| Antidiabetic therapy             |                                            |
| Insulins                         | A10A                                       |
| Blood Glucose lowering drugs     | A10B                                       |
| Antithrombotic drugs             | B01A                                       |
| Drugs for hypertension           |                                            |
| Antihypertensives                | C02DB, C02CA, C08, C09                     |
| Diuretics, Thiazides, plan       | C03AA - Eller hele gruppen C03 Diuretics ? |
| Beta blockers                    | C07                                        |
| Cholesterol-lowering drugs       | C10AA, C10AB, C10AD, C10AX, C10B           |
| Corticosteroids for systemic use | H02A                                       |
| Obstructive airway disease       | R03                                        |
| Opioids                          | N02A                                       |
| Codeine                          | R05DA04                                    |
| Acetaminophen                    | N02B                                       |
| NSAID                            | M01A                                       |
| Neuropathic pain relievers       |                                            |
| Antiepileptics drugs             | N03AX                                      |
| Antidepressants                  | N06AA, N06AX                               |
| Drugs for alcohol addiction      | N07BB, N03AA, N05BA                        |
| Drugs for smoking cessation      | N07BA, N06AX,                              |

Progression of disease preceding lower extremity amputation in Denmark: A longitudinal registry study of diagnoses, use of medication and healthcare services 14 years prior to amputation

### **Codes used to estimate the progression of diseases over 14 years prior to amputation by combining diagnosis and prescribed medication**

#### *Atherosclerosis<sup>Com</sup>*

|                            |                                           |
|----------------------------|-------------------------------------------|
| Arteriosclerosis           | ICD code DI70                             |
| Cholesterol-lowering drugs | ACT code C10AA, C10AB, C10AD, C10AX, C10B |

#### *Diabetes<sup>Com</sup>*

|                      |                                       |
|----------------------|---------------------------------------|
| Diabetes             | ICD code DE10, DE11, DE12, DE13, DE14 |
| Antidiabetic therapy | ACT code A10A, A10B                   |

#### *Cardiovascular diseases<sup>Com</sup>*

|                                               |                                              |
|-----------------------------------------------|----------------------------------------------|
| Cardiac ischemia                              | ICD code DI20, DI21, DI22, DI23, DI24, DI25, |
| Congestive heart failure, cardiac arrhythmia, | Elx_GRP_1, ELX_GRP_2                         |
| Beta blockers, Antithrombotic drugs           | ACT code C07, B01A                           |

#### *Hypertension<sup>Com</sup>*

|                        |                                        |
|------------------------|----------------------------------------|
| Hypertension           | ICD code DI10, DI11, DI12, DI13, DI,15 |
| Drugs for hypertension | ACT code C02DB, C02CA, C03AA, C08, C09 |

#### *Prescribed opioids*

|                   |                        |
|-------------------|------------------------|
| ACT code, opioids | ACT code N02A, R05DA04 |
|-------------------|------------------------|

### **Subgroup analysis according to diseases**

#### *CVD*

|                                               |                                              |
|-----------------------------------------------|----------------------------------------------|
| Arteriosclerosis                              | ICD code DI70                                |
| Cardiac ischemia                              | ICD code DI20, DI21, DI22, DI23, DI24, DI25, |
| Congestive heart failure, cardiac arrhythmia, | Elx_GRP_1, ELX_GRP_2                         |
| Emboli                                        | DI80, DI81, DI82, DI74                       |
| Stroke                                        | DI60, DI61, DI62, DI63, DI64, DG45, DG46     |
| Cerebrocardiovascular disease                 | CC_GRP_4                                     |

#### *Diabetes:*

Diabetes<sup>Com</sup>

#### *In risk of LEA*

Group "CVD" and "Diabetes<sup>Com</sup>" combined

#### *No CVD or Diabetes*

Patient not included in the group "In risk of LEA"

**Note:** ELX\_GRP\_x refers to The Elixhauser Comorbidity Index, CC\_GRP\_X refers to Charlson Comorbidity Index
